# Supplementary material for: Active Degradation Explains the Distribution of Nuclear Proteins during Cellular Senescence
Source: PubMed Central journal article supplement (PMC4483236; doi:10.1371/journal.pone.0118442), 2015-06-26
Supplement: pone.0118442.s001.pdf [file pone.0118442.s001.pdf]

# Active Degradation Explains the Distribution of Nuclear Proteins during Cellular Senescence

## Supplementary Materials

Enrico Giampieri<sup>1,\*</sup>, Marco De Cecco<sup>2</sup>, Daniel Remondini<sup>1</sup>, John Sedivy<sup>2</sup>, Gastone Castellani<sup>1</sup>

**1** Department of Physics and Astronomy, Bologna University, Bologna, Italy and INFN Bologna.

**2** Department of Molecular Biology, Cell Biology and Biochemistry, Center for Genomics and Proteomics, Brown University, Providence, RI, USA.

\* E-mail: enrico.giampieri@unibo.it

### Supplementary Table 1

| NUCLEUS AREA | FUORESCENT SIGNAL | PASSAGE NUMBER | EXPERIMENT ID |
|--------------|-------------------|----------------|---------------|
| 11505        | 3971              | 13             | 4             |
| 8590         | 4610              | 13             | 4             |
| 10348        | 4130              | 13             | 4             |
| 10166        | 3193              | 13             | 4             |
| 20864        | 10877             | 13             | 4             |
| 10919        | 2579              | 13             | 4             |
| 10535        | 5004              | 13             | 4             |
| 11266        | 5956              | 13             | 4             |
| 8143         | 1593              | 13             | 4             |
| 9067         | 3141              | 13             | 4             |
| 10655        | 3660              | 13             | 4             |
| 7316         | 1519              | 13             | 4             |
| 6433         | 1917              | 13             | 4             |
| 9898         | 3981              | 13             | 4             |
| 14172        | 7244              | 13             | 4             |
| 13397        | 5059              | 13             | 4             |
| 15614        | 3452              | 13             | 4             |
| 12084        | 3835              | 13             | 4             |
| 6547         | 2411              | 13             | 4             |
| 14267        | 4115              | 13             | 4             |
| 10707        | 4222              | 13             | 4             |
| 9220         | 2386              | 13             | 4             |
| 2977         | 611               | 13             | 4             |
| 8109         | 1533              | 13             | 4             |
| 3061         | 597               | 13             | 4             |
| 3022         | 411               | 13             | 4             |
| 8749         | 3500              | 13             | 4             |
| 5938         | 2048              | 13             | 4             |
| 7017         | 2033              | 13             | 4             |
| 13853        | 5427              | 13             | 4             |
| 8118         | 2045              | 13             | 4             |
| 3618         | 1126              | 13             | 4             |

| NUCLEUS AREA | FUORESCENT SIGNAL | PASSAGE NUMBER | EXPERIMENT ID |
|--------------|-------------------|----------------|---------------|
| 11800        | 5399              | 13             | 4             |
| 18236        | 5946              | 13             | 4             |
| 32649        | 14974             | 13             | 4             |
| 10481        | 3842              | 13             | 4             |
| 9772         | 4120              | 13             | 4             |
| 9717         | 3699              | 13             | 4             |
| 35916        | 11497             | 13             | 4             |
| 10074        | 2622              | 13             | 4             |
| 7830         | 2172              | 13             | 4             |
| 7331         | 2026              | 13             | 4             |
| 15321        | 3042              | 13             | 4             |
| 17064        | 6463              | 13             | 4             |
| 10967        | 4479              | 13             | 4             |
| 20360        | 10145             | 13             | 4             |
| 5914         | 2506              | 13             | 4             |
| 6065         | 3443              | 13             | 4             |
| 8336         | 2601              | 13             | 4             |
| 18315        | 8105              | 13             | 4             |
| 14586        | 11426             | 13             | 4             |
| 7831         | 3071              | 13             | 4             |
| 8598         | 2029              | 13             | 4             |
| 6208         | 2330              | 13             | 4             |
| 10925        | 3098              | 13             | 4             |
| 9369         | 2856              | 13             | 4             |
| 17124        | 7820              | 13             | 4             |
| 9916         | 2471              | 13             | 4             |
| 8805         | 2098              | 13             | 4             |
| 9362         | 1769              | 13             | 4             |
| 9042         | 2130              | 13             | 4             |
| 13330        | 3810              | 13             | 4             |
| 8110         | 3464              | 13             | 4             |
| 7116         | 1650              | 13             | 4             |
| 18189        | 4264              | 13             | 4             |
| 5129         | 1521              | 13             | 4             |
| 5615         | 1537              | 13             | 4             |
| 11648        | 6834              | 13             | 4             |
| 11493        | 5881              | 13             | 4             |
| 9216         | 2661              | 13             | 4             |
| 11573        | 2707              | 13             | 4             |
| 7796         | 1717              | 13             | 4             |
| 16771        | 10837             | 13             | 4             |
| 7336         | 1996              | 13             | 4             |
| 8279         | 2766              | 13             | 4             |
| 15369        | 5330              | 13             | 4             |
| 9798         | 3869              | 13             | 4             |
| 5595         | 2186              | 13             | 4             |
| 22634        | 10094             | 13             | 4             |
| 18243        | 13400             | 13             | 4             |

| NUCLEUS AREA | FUORESCENT SIGNAL | PASSAGE NUMBER | EXPERIMENT ID |
|--------------|-------------------|----------------|---------------|
| 22013        | 9148              | 13             | 4             |
| 6618         | 1688              | 13             | 4             |
| 3991         | 1076              | 13             | 4             |
| 9154         | 5149              | 13             | 4             |
| 7391         | 2575              | 13             | 4             |
| 9201         | 3181              | 13             | 4             |
| 15244        | 4092              | 13             | 4             |
| 4136         | 1556              | 13             | 4             |
| 3939         | 2568              | 13             | 4             |
| 2979         | 2525              | 13             | 4             |
| 10663        | 3586              | 13             | 4             |
| 9385         | 3078              | 13             | 4             |
| 17024        | 5506              | 13             | 4             |
| 8499         | 2229              | 13             | 4             |
| 6981         | 1810              | 13             | 4             |
| 18032        | 4606              | 13             | 4             |
| 7401         | 1774              | 13             | 4             |
| 5709         | 751               | 13             | 4             |
| 7715         | 1072              | 13             | 4             |
| 15446        | 2790              | 13             | 4             |
| 11315        | 3389              | 13             | 4             |
| 5477         | 779               | 13             | 4             |
| 8004         | 1389              | 13             | 4             |
| 7196         | 2149              | 13             | 4             |
| 6770         | 2559              | 13             | 4             |
| 7197         | 2809              | 13             | 4             |
| 11879        | 5909              | 13             | 4             |
| 11958        | 6323              | 13             | 4             |
| 5285         | 2683              | 13             | 4             |
| 11817        | 4663              | 13             | 4             |
| 11092        | 2815              | 13             | 4             |
| 11369        | 8005              | 13             | 4             |
| 6424         | 1301              | 13             | 4             |
| 4230         | 285               | 13             | 4             |
| 8383         | 2443              | 13             | 4             |
| 14280        | 6056              | 13             | 4             |
| 7864         | 2137              | 13             | 4             |
| 6929         | 1435              | 13             | 4             |
| 9855         | 2466              | 13             | 4             |
| 3639         | 1198              | 3              | 1             |
| 3322         | 880               | 3              | 1             |
| 1531         | 509               | 3              | 1             |
| 4590         | 1806              | 3              | 1             |
| 3800         | 1426              | 3              | 1             |
| 2448         | 1193              | 3              | 1             |
| 2236         | 947               | 3              | 1             |
| 3202         | 1512              | 3              | 1             |
| 1586         | 865               | 3              | 1             |

| NUCLEUS AREA | FUORESCENT SIGNAL | PASSAGE NUMBER | EXPERIMENT ID |
|--------------|-------------------|----------------|---------------|
| 4904         | 2037              | 3              | 1             |
| 3834         | 799               | 3              | 1             |
| 3667         | 1071              | 3              | 1             |
| 4386         | 1195              | 3              | 1             |
| 3788         | 1156              | 3              | 1             |
| 2741         | 1373              | 3              | 1             |
| 4307         | 1688              | 3              | 1             |
| 2681         | 1023              | 3              | 1             |
| 1845         | 895               | 3              | 1             |
| 2789         | 1237              | 3              | 1             |
| 3775         | 1686              | 3              | 1             |
| 4126         | 1967              | 3              | 1             |
| 1285         | 332               | 3              | 1             |
| 4620         | 1127              | 3              | 1             |
| 3749         | 1129              | 3              | 1             |
| 2584         | 990               | 3              | 1             |
| 2577         | 961               | 3              | 1             |
| 3642         | 1620              | 3              | 1             |
| 2865         | 1402              | 3              | 1             |
| 2111         | 1078              | 3              | 1             |
| 3844         | 1705              | 3              | 1             |
| 2623         | 1229              | 3              | 1             |
| 1572         | 857               | 3              | 1             |
| 1686         | 356               | 3              | 1             |
| 2394         | 622               | 3              | 1             |
| 2834         | 854               | 3              | 1             |
| 3281         | 974               | 3              | 1             |
| 5039         | 1938              | 3              | 1             |
| 3659         | 1535              | 3              | 1             |
| 4503         | 1910              | 3              | 1             |
| 3276         | 851               | 3              | 1             |
| 1907         | 555               | 3              | 1             |
| 3833         | 1036              | 3              | 1             |
| 5049         | 1445              | 3              | 1             |
| 5011         | 1524              | 3              | 1             |
| 3681         | 1306              | 3              | 1             |
| 3127         | 1373              | 3              | 1             |
| 1645         | 659               | 3              | 1             |
| 2512         | 1228              | 3              | 1             |
| 1586         | 620               | 3              | 1             |
| 3835         | 1487              | 3              | 1             |
| 3782         | 1822              | 3              | 1             |
| 1399         | 468               | 3              | 1             |
| 1948         | 427               | 3              | 1             |
| 4500         | 1267              | 3              | 1             |
| 3232         | 908               | 3              | 1             |
| 5066         | 1350              | 3              | 1             |
| 3173         | 1355              | 3              | 1             |

| NUCLEUS AREA | FUORESCENT SIGNAL | PASSAGE NUMBER | EXPERIMENT ID |
|--------------|-------------------|----------------|---------------|
| 4284         | 1728              | 3              | 1             |
| 4114         | 1645              | 3              | 1             |
| 4206         | 1058              | 3              | 1             |
| 2120         | 583               | 3              | 1             |
| 2071         | 643               | 3              | 1             |
| 3926         | 1220              | 3              | 1             |
| 4800         | 1543              | 3              | 1             |
| 2867         | 903               | 3              | 1             |
| 2002         | 807               | 3              | 1             |
| 2530         | 981               | 3              | 1             |
| 3548         | 1296              | 3              | 1             |
| 4664         | 1685              | 3              | 1             |
| 2373         | 932               | 3              | 1             |
| 1488         | 623               | 3              | 1             |
| 3809         | 1113              | 3              | 1             |
| 3625         | 906               | 3              | 1             |
| 1534         | 624               | 3              | 1             |
| 2566         | 888               | 3              | 1             |
| 3666         | 1163              | 3              | 1             |
| 2222         | 877               | 3              | 1             |
| 2539         | 958               | 3              | 1             |
| 3277         | 1005              | 3              | 1             |
| 3883         | 1165              | 3              | 1             |
| 2487         | 1286              | 3              | 1             |
| 2736         | 1126              | 3              | 1             |
| 3612         | 1493              | 3              | 1             |
| 2788         | 1091              | 3              | 1             |
| 2295         | 1041              | 3              | 1             |
| 2381         | 618               | 3              | 1             |
| 4146         | 1256              | 3              | 1             |
| 1815         | 484               | 3              | 1             |
| 2600         | 995               | 3              | 1             |
| 2899         | 1123              | 3              | 1             |
| 2874         | 1116              | 3              | 1             |
| 2466         | 1155              | 3              | 1             |
| 4204         | 1581              | 3              | 1             |
| 6380         | 2387              | 3              | 1             |
| 2721         | 326               | 3              | 1             |
| 4358         | 560               | 3              | 1             |
| 1881         | 378               | 3              | 1             |
| 4844         | 837               | 3              | 1             |
| 3886         | 719               | 3              | 1             |
| 5678         | 1438              | 3              | 1             |
| 1998         | 802               | 3              | 1             |
| 3249         | 784               | 3              | 1             |
| 3769         | 573               | 3              | 1             |
| 2589         | 997               | 3              | 1             |
| 2897         | 840               | 3              | 1             |

| NUCLEUS AREA | FUORESCENT SIGNAL | PASSAGE NUMBER | EXPERIMENT ID |
|--------------|-------------------|----------------|---------------|
| 2901         | 807               | 3              | 1             |
| 4585         | 526               | 3              | 1             |
| 7520         | 808               | 3              | 1             |
| 1807         | 579               | 3              | 1             |
| 1661         | 559               | 3              | 1             |
| 3468         | 561               | 3              | 1             |
| 2379         | 766               | 3              | 1             |
| 2011         | 753               | 3              | 1             |
| 1642         | 621               | 3              | 1             |
| 1997         | 715               | 3              | 1             |
| 2513         | 536               | 3              | 1             |
| 3996         | 480               | 3              | 1             |
| 2243         | 190               | 3              | 1             |
| 4198         | 452               | 3              | 1             |
| 4440         | 1055              | 3              | 1             |
| 4437         | 1082              | 3              | 1             |
| 2100         | 847               | 3              | 1             |
| 2242         | 700               | 3              | 1             |
| 4857         | 1120              | 3              | 1             |
| 3127         | 858               | 3              | 1             |
| 3069         | 880               | 3              | 1             |
| 3982         | 1018              | 3              | 1             |
| 3289         | 441               | 3              | 1             |
| 2259         | 863               | 3              | 1             |
| 4128         | 829               | 3              | 1             |
| 3212         | 794               | 3              | 1             |
| 2658         | 727               | 3              | 1             |
| 5037         | 1133              | 3              | 1             |
| 6467         | 1831              | 3              | 1             |
| 1393         | 519               | 3              | 1             |
| 3249         | 759               | 3              | 1             |
| 3440         | 837               | 3              | 1             |
| 3671         | 903               | 3              | 1             |
| 2359         | 630               | 3              | 1             |
| 4235         | 921               | 3              | 1             |
| 8217         | 852               | 3              | 1             |
| 2674         | 282               | 3              | 1             |
| 1264         | 133               | 3              | 1             |
| 4819         | 622               | 3              | 1             |
| 4968         | 1000              | 3              | 1             |
| 3688         | 767               | 3              | 1             |
| 4162         | 866               | 3              | 1             |
| 4409         | 933               | 3              | 1             |
| 2687         | 638               | 3              | 1             |
| 2363         | 687               | 3              | 1             |
| 3514         | 907               | 3              | 1             |
| 1844         | 601               | 3              | 1             |
| 1355         | 152               | 3              | 1             |

| NUCLEUS AREA | FUORESCENT SIGNAL | PASSAGE NUMBER | EXPERIMENT ID |
|--------------|-------------------|----------------|---------------|
| 2336         | 789               | 3              | 1             |
| 2515         | 316               | 3              | 1             |
| 2390         | 710               | 3              | 1             |
| 3241         | 653               | 3              | 1             |
| 2316         | 594               | 3              | 1             |
| 4346         | 1003              | 3              | 1             |
| 1862         | 554               | 3              | 1             |
| 1938         | 209               | 3              | 1             |
| 1378         | 161               | 3              | 1             |
| 3201         | 370               | 3              | 1             |
| 3980         | 660               | 3              | 1             |
| 2550         | 854               | 3              | 1             |
| 1940         | 691               | 3              | 1             |
| 1823         | 624               | 3              | 1             |
| 2898         | 1109              | 3              | 1             |
| 3978         | 1249              | 3              | 1             |
| 1811         | 652               | 3              | 1             |
| 3838         | 1106              | 3              | 1             |
| 2907         | 1135              | 3              | 1             |
| 3431         | 1195              | 3              | 1             |
| 4213         | 957               | 3              | 1             |
| 3184         | 911               | 3              | 1             |
| 4485         | 1293              | 3              | 1             |
| 3200         | 848               | 3              | 1             |
| 1344         | 492               | 3              | 1             |
| 2706         | 775               | 3              | 1             |
| 2645         | 864               | 3              | 1             |
| 2386         | 675               | 3              | 1             |
| 2185         | 775               | 3              | 1             |
| 4446         | 841               | 3              | 1             |
| 3188         | 1010              | 3              | 1             |
| 2762         | 770               | 3              | 1             |
| 2538         | 511               | 3              | 1             |
| 2521         | 516               | 3              | 1             |
| 2714         | 621               | 3              | 1             |
| 1697         | 405               | 3              | 1             |
| 2799         | 555               | 3              | 1             |
| 1919         | 377               | 3              | 1             |
| 1484         | 327               | 3              | 1             |
| 2335         | 482               | 3              | 1             |
| 2380         | 412               | 3              | 1             |
| 1862         | 412               | 3              | 1             |
| 1630         | 420               | 3              | 1             |
| 4060         | 1021              | 3              | 1             |
| 3686         | 1107              | 3              | 1             |
| 3113         | 1198              | 3              | 1             |
| 2949         | 888               | 3              | 1             |
| 3073         | 1088              | 3              | 1             |

| NUCLEUS AREA | FUORESCENT SIGNAL | PASSAGE NUMBER | EXPERIMENT ID |
|--------------|-------------------|----------------|---------------|
| 2500         | 722               | 3              | 1             |
| 1932         | 618               | 3              | 1             |
| 1864         | 581               | 3              | 1             |
| 2900         | 1036              | 3              | 1             |
| 4054         | 1169              | 3              | 1             |
| 1901         | 624               | 3              | 1             |
| 3348         | 836               | 3              | 1             |
| 2084         | 734               | 3              | 1             |
| 2178         | 787               | 3              | 1             |
| 3467         | 1252              | 3              | 1             |
| 1910         | 817               | 3              | 1             |
| 2363         | 374               | 3              | 1             |
| 1746         | 400               | 3              | 1             |
| 3158         | 698               | 3              | 1             |
| 1791         | 531               | 3              | 1             |
| 7282         | 2096              | 3              | 1             |
| 3395         | 853               | 3              | 1             |
| 5929         | 1370              | 3              | 1             |
| 3263         | 1087              | 3              | 1             |
| 3253         | 620               | 3              | 1             |
| 2509         | 759               | 3              | 1             |
| 2303         | 688               | 3              | 1             |
| 4831         | 1234              | 3              | 1             |
| 1509         | 468               | 3              | 1             |
| 2305         | 787               | 3              | 1             |
| 2094         | 717               | 3              | 1             |
| 1687         | 383               | 3              | 1             |
| 2125         | 508               | 3              | 1             |
| 2507         | 824               | 3              | 1             |
| 3174         | 1069              | 3              | 1             |
| 1337         | 450               | 3              | 1             |
| 1396         | 472               | 3              | 1             |
| 2112         | 709               | 3              | 1             |
| 3047         | 1065              | 3              | 1             |
| 1264         | 465               | 3              | 1             |
| 2464         | 634               | 3              | 1             |
| 3491         | 1081              | 3              | 1             |
| 1688         | 557               | 3              | 1             |
| 1603         | 571               | 3              | 1             |
| 2443         | 767               | 3              | 1             |
| 3064         | 1225              | 3              | 1             |
| 2840         | 1083              | 3              | 1             |
| 2941         | 1073              | 3              | 1             |
| 6078         | 2158              | 3              | 1             |
| 3375         | 1270              | 3              | 1             |
| 1854         | 550               | 3              | 1             |
| 1639         | 496               | 3              | 1             |
| 1864         | 549               | 3              | 1             |



| NUCLEUS AREA | FUORESCENT SIGNAL | PASSAGE NUMBER | EXPERIMENT ID |
|--------------|-------------------|----------------|---------------|
| 1562         | 543               | 3              | 1             |
| 2443         | 776               | 3              | 1             |
| 1839         | 545               | 3              | 1             |
| 5575         | 1554              | 3              | 1             |
| 2469         | 662               | 3              | 1             |
| 3389         | 1145              | 3              | 1             |
| 3585         | 1280              | 3              | 1             |
| 4047         | 1322              | 3              | 1             |
| 1820         | 634               | 3              | 1             |
| 6163         | 2136              | 3              | 1             |
| 4436         | 1503              | 3              | 1             |
| 2316         | 373               | 3              | 1             |
| 2232         | 465               | 3              | 1             |
| 2301         | 537               | 3              | 1             |
| 5224         | 1153              | 3              | 1             |
| 1800         | 516               | 3              | 1             |
| 3548         | 1133              | 3              | 1             |
| 1747         | 490               | 3              | 1             |
| 2912         | 734               | 3              | 1             |
| 2672         | 703               | 3              | 1             |
| 2650         | 929               | 3              | 1             |
| 4024         | 1304              | 3              | 1             |
| 1499         | 678               | 3              | 1             |
| 2113         | 817               | 3              | 1             |
| 2980         | 602               | 3              | 1             |
| 3592         | 910               | 3              | 1             |
| 3295         | 940               | 3              | 1             |
| 2849         | 744               | 3              | 1             |
| 2067         | 652               | 3              | 1             |
| 3471         | 937               | 3              | 1             |
| 2662         | 839               | 3              | 1             |
| 1979         | 682               | 3              | 1             |
| 1397         | 575               | 3              | 1             |
| 2045         | 441               | 3              | 1             |
| 2809         | 683               | 3              | 1             |
| 2645         | 754               | 3              | 1             |
| 3023         | 1028              | 3              | 1             |
| 2674         | 881               | 3              | 1             |
| 2103         | 917               | 3              | 1             |
| 1636         | 621               | 3              | 1             |
| 2920         | 1154              | 3              | 1             |
| 1403         | 599               | 3              | 1             |
| 2669         | 1127              | 3              | 1             |
| 2749         | 930               | 3              | 1             |
| 1955         | 747               | 3              | 1             |
| 2103         | 767               | 3              | 1             |
| 2670         | 1185              | 3              | 1             |
| 1339         | 725               | 3              | 1             |

| NUCLEUS AREA | FUORESCENT SIGNAL | PASSAGE NUMBER | EXPERIMENT ID |
|--------------|-------------------|----------------|---------------|
| 2127         | 748               | 3              | 1             |
| 2652         | 678               | 3              | 2             |
| 2114         | 680               | 3              | 2             |
| 3291         | 615               | 3              | 2             |
| 2899         | 651               | 3              | 2             |
| 3479         | 1010              | 3              | 2             |
| 3908         | 1159              | 3              | 2             |
| 4536         | 899               | 3              | 2             |
| 2836         | 655               | 3              | 2             |
| 5439         | 1234              | 3              | 2             |
| 1449         | 240               | 3              | 2             |
| 5382         | 897               | 3              | 2             |
| 11818        | 2324              | 3              | 2             |
| 3578         | 553               | 3              | 2             |
| 3576         | 620               | 3              | 2             |
| 11936        | 2545              | 3              | 2             |
| 2678         | 430               | 3              | 2             |
| 2576         | 899               | 3              | 2             |
| 4804         | 1297              | 3              | 2             |
| 2485         | 691               | 3              | 2             |
| 2580         | 759               | 3              | 2             |
| 12022        | 2821              | 3              | 2             |
| 2952         | 553               | 3              | 2             |
| 3071         | 773               | 3              | 2             |
| 2497         | 828               | 3              | 2             |
| 8104         | 1654              | 3              | 2             |
| 2408         | 601               | 3              | 2             |
| 2490         | 601               | 3              | 2             |
| 2671         | 641               | 3              | 2             |
| 10598        | 2030              | 3              | 2             |
| 5718         | 750               | 3              | 2             |
| 11118        | 2117              | 3              | 2             |
| 2714         | 632               | 3              | 2             |
| 3525         | 510               | 3              | 2             |
| 2640         | 633               | 3              | 2             |
| 2923         | 511               | 3              | 2             |
| 3645         | 1732              | 3              | 2             |
| 9754         | 2275              | 3              | 2             |
| 2022         | 611               | 3              | 2             |
| 2980         | 869               | 3              | 2             |
| 3404         | 661               | 3              | 2             |
| 3048         | 868               | 3              | 2             |
| 4058         | 1140              | 3              | 2             |
| 3480         | 817               | 3              | 2             |
| 2957         | 687               | 3              | 2             |
| 2685         | 477               | 3              | 2             |
| 3380         | 927               | 3              | 2             |
| 1552         | 257               | 3              | 2             |

| NUCLEUS AREA | FUORESCENT SIGNAL | PASSAGE NUMBER | EXPERIMENT ID |
|--------------|-------------------|----------------|---------------|
| 2739         | 630               | 3              | 2             |
| 2666         | 555               | 3              | 2             |
| 5815         | 902               | 3              | 2             |
| 4910         | 1003              | 3              | 2             |
| 2689         | 587               | 3              | 2             |
| 3107         | 609               | 3              | 2             |
| 3182         | 809               | 3              | 2             |
| 2175         | 713               | 3              | 2             |
| 3952         | 1630              | 3              | 2             |
| 2827         | 710               | 3              | 2             |
| 2923         | 743               | 3              | 2             |
| 2755         | 774               | 3              | 2             |
| 2257         | 740               | 3              | 2             |
| 2802         | 724               | 3              | 2             |
| 2633         | 780               | 3              | 2             |
| 3453         | 706               | 3              | 2             |
| 3164         | 538               | 3              | 2             |
| 2706         | 572               | 3              | 2             |
| 2544         | 596               | 3              | 2             |
| 4974         | 981               | 3              | 2             |
| 3893         | 1107              | 3              | 2             |
| 2662         | 640               | 3              | 2             |
| 7447         | 1269              | 3              | 2             |
| 4472         | 1383              | 3              | 2             |
| 3655         | 1139              | 3              | 2             |
| 2735         | 788               | 3              | 2             |
| 4325         | 853               | 3              | 2             |
| 3020         | 764               | 3              | 2             |
| 6050         | 1501              | 3              | 2             |
| 3878         | 1190              | 3              | 2             |
| 2338         | 885               | 3              | 2             |
| 3489         | 994               | 3              | 2             |
| 3634         | 609               | 3              | 2             |
| 5612         | 1203              | 3              | 2             |
| 5061         | 692               | 3              | 2             |
| 2557         | 601               | 3              | 2             |
| 3288         | 618               | 3              | 2             |
| 3946         | 1097              | 3              | 2             |
| 3891         | 717               | 3              | 2             |
| 3308         | 592               | 3              | 2             |
| 5235         | 936               | 3              | 2             |
| 2635         | 988               | 3              | 2             |
| 2883         | 783               | 3              | 2             |
| 2671         | 727               | 3              | 2             |
| 3506         | 1170              | 3              | 2             |
| 4225         | 1490              | 3              | 2             |
| 4156         | 997               | 3              | 2             |
| 4910         | 1339              | 3              | 2             |

| NUCLEUS AREA | FUORESCENT SIGNAL | PASSAGE NUMBER | EXPERIMENT ID |
|--------------|-------------------|----------------|---------------|
| 2211         | 810               | 3              | 2             |
| 1486         | 569               | 3              | 2             |
| 2477         | 735               | 3              | 2             |
| 4964         | 972               | 3              | 2             |
| 2819         | 580               | 3              | 2             |
| 3349         | 644               | 3              | 2             |
| 3360         | 528               | 3              | 2             |
| 3954         | 803               | 3              | 2             |
| 3332         | 467               | 3              | 2             |
| 5359         | 1039              | 3              | 2             |
| 8528         | 3799              | 3              | 2             |
| 3355         | 951               | 3              | 2             |
| 5520         | 1616              | 3              | 2             |
| 2172         | 791               | 3              | 2             |
| 2497         | 536               | 3              | 2             |
| 3384         | 887               | 3              | 2             |
| 4817         | 1410              | 3              | 2             |
| 2849         | 1063              | 3              | 2             |
| 3091         | 701               | 3              | 2             |
| 3881         | 999               | 3              | 2             |
| 2657         | 848               | 3              | 2             |
| 3840         | 772               | 3              | 2             |
| 2770         | 705               | 3              | 2             |
| 3437         | 568               | 3              | 2             |
| 3216         | 506               | 3              | 2             |
| 3205         | 446               | 3              | 2             |
| 3762         | 751               | 3              | 2             |
| 3450         | 1369              | 3              | 2             |
| 3125         | 1041              | 3              | 2             |
| 3025         | 1013              | 3              | 2             |
| 2422         | 913               | 3              | 2             |
| 2646         | 658               | 3              | 2             |
| 2390         | 952               | 3              | 2             |
| 6618         | 2075              | 3              | 2             |
| 3797         | 1197              | 3              | 2             |
| 3121         | 670               | 3              | 2             |
| 3189         | 524               | 3              | 2             |
| 3352         | 554               | 3              | 2             |
| 2869         | 570               | 3              | 2             |
| 2851         | 550               | 3              | 2             |
| 5339         | 1087              | 3              | 2             |
| 4731         | 1424              | 3              | 2             |
| 2618         | 731               | 3              | 2             |
| 3421         | 1100              | 3              | 2             |
| 3420         | 949               | 3              | 2             |
| 4934         | 1221              | 3              | 2             |
| 2501         | 675               | 3              | 2             |
| 2493         | 672               | 3              | 2             |

| NUCLEUS AREA | FUORESCENT SIGNAL | PASSAGE NUMBER | EXPERIMENT ID |
|--------------|-------------------|----------------|---------------|
| 2868         | 852               | 3              | 2             |
| 3525         | 688               | 3              | 2             |
| 3509         | 614               | 3              | 2             |
| 11627        | 2775              | 3              | 2             |
| 4896         | 2312              | 3              | 2             |
| 2945         | 877               | 3              | 2             |
| 2639         | 756               | 3              | 2             |
| 3137         | 855               | 3              | 2             |
| 2456         | 835               | 3              | 2             |
| 2572         | 691               | 3              | 2             |
| 2822         | 998               | 3              | 2             |
| 1819         | 577               | 3              | 2             |
| 3419         | 534               | 3              | 2             |
| 3376         | 433               | 3              | 2             |
| 2728         | 729               | 3              | 2             |
| 1663         | 676               | 3              | 2             |
| 2430         | 729               | 3              | 2             |
| 2616         | 782               | 3              | 2             |
| 2502         | 773               | 3              | 2             |
| 2859         | 1080              | 3              | 2             |
| 7807         | 2395              | 3              | 2             |
| 3060         | 656               | 3              | 2             |
| 3437         | 953               | 3              | 2             |
| 2658         | 795               | 3              | 2             |
| 3068         | 886               | 3              | 2             |
| 2069         | 685               | 3              | 2             |
| 6423         | 2199              | 3              | 2             |
| 3113         | 872               | 3              | 2             |
| 2082         | 677               | 3              | 2             |
| 2645         | 817               | 3              | 2             |
| 2568         | 760               | 3              | 2             |
| 1731         | 577               | 3              | 2             |
| 2756         | 677               | 3              | 2             |
| 5034         | 1366              | 3              | 2             |
| 1821         | 668               | 3              | 2             |
| 3159         | 956               | 3              | 2             |
| 2767         | 866               | 3              | 2             |
| 1863         | 632               | 3              | 2             |
| 3958         | 1743              | 3              | 2             |
| 3256         | 1161              | 3              | 2             |
| 3662         | 903               | 3              | 2             |
| 2948         | 743               | 3              | 2             |
| 2958         | 773               | 3              | 2             |
| 2964         | 941               | 3              | 2             |
| 2839         | 899               | 3              | 2             |
| 2230         | 805               | 3              | 2             |
| 2557         | 994               | 3              | 2             |
| 3843         | 1074              | 3              | 2             |

| NUCLEUS AREA | FUORESCENT SIGNAL | PASSAGE NUMBER | EXPERIMENT ID |
|--------------|-------------------|----------------|---------------|
| 5564         | 1547              | 3              | 3             |
| 5145         | 1339              | 3              | 3             |
| 5922         | 2272              | 3              | 3             |
| 4835         | 1725              | 3              | 3             |
| 3625         | 1335              | 3              | 3             |
| 6510         | 2353              | 3              | 3             |
| 7543         | 2688              | 3              | 3             |
| 2339         | 887               | 3              | 3             |
| 8034         | 3255              | 3              | 3             |
| 1997         | 805               | 3              | 3             |
| 5306         | 1943              | 3              | 3             |
| 4522         | 1501              | 3              | 3             |
| 8840         | 3352              | 3              | 3             |
| 8280         | 3071              | 3              | 3             |
| 4716         | 1835              | 3              | 3             |
| 6848         | 2461              | 3              | 3             |
| 6466         | 2433              | 3              | 3             |
| 8097         | 2738              | 3              | 3             |
| 5904         | 2037              | 3              | 3             |
| 4070         | 1582              | 3              | 3             |
| 7719         | 1612              | 3              | 3             |
| 6183         | 1418              | 3              | 3             |
| 4179         | 1051              | 3              | 3             |
| 6979         | 1989              | 3              | 3             |
| 6809         | 1741              | 3              | 3             |
| 8653         | 2719              | 3              | 3             |
| 5275         | 1658              | 3              | 3             |
| 5082         | 1726              | 3              | 3             |
| 5014         | 1705              | 3              | 3             |
| 4750         | 1689              | 3              | 3             |
| 2845         | 961               | 3              | 3             |
| 4229         | 1472              | 3              | 3             |
| 3657         | 927               | 3              | 3             |
| 5399         | 1424              | 3              | 3             |
| 8662         | 2391              | 3              | 3             |
| 6410         | 2082              | 3              | 3             |
| 3653         | 1176              | 3              | 3             |
| 4186         | 1195              | 3              | 3             |
| 3031         | 828               | 3              | 3             |
| 4046         | 1391              | 3              | 3             |
| 4831         | 1405              | 3              | 3             |
| 5928         | 2004              | 3              | 3             |
| 4621         | 1651              | 3              | 3             |
| 3895         | 1369              | 3              | 3             |
| 7154         | 2943              | 3              | 3             |
| 3944         | 1353              | 3              | 3             |
| 4141         | 1494              | 3              | 3             |
| 4329         | 959               | 3              | 3             |

| NUCLEUS AREA | FUORESCENT SIGNAL | PASSAGE NUMBER | EXPERIMENT ID |
|--------------|-------------------|----------------|---------------|
| 3923         | 942               | 3              | 3             |
| 5692         | 1598              | 3              | 3             |
| 2608         | 678               | 3              | 3             |
| 4446         | 1252              | 3              | 3             |
| 4044         | 1180              | 3              | 3             |
| 3377         | 1457              | 3              | 3             |
| 4213         | 1210              | 3              | 3             |
| 3622         | 1228              | 3              | 3             |
| 9877         | 3065              | 3              | 3             |
| 3048         | 1226              | 3              | 3             |
| 7821         | 2407              | 3              | 3             |
| 3656         | 1657              | 3              | 3             |
| 4433         | 2282              | 3              | 3             |
| 4610         | 1541              | 3              | 3             |
| 3416         | 916               | 3              | 3             |
| 5749         | 1579              | 3              | 3             |
| 12269        | 3755              | 3              | 3             |
| 11538        | 5179              | 3              | 3             |
| 5863         | 2693              | 3              | 3             |
| 8869         | 3331              | 3              | 3             |
| 4270         | 1623              | 3              | 3             |
| 3650         | 1273              | 3              | 3             |
| 4111         | 1164              | 3              | 3             |
| 4483         | 1362              | 3              | 3             |
| 5281         | 1635              | 3              | 3             |
| 4421         | 1524              | 3              | 3             |
| 3687         | 1385              | 3              | 3             |
| 3654         | 1640              | 3              | 3             |
| 6196         | 2641              | 3              | 3             |
| 2805         | 1068              | 3              | 3             |
| 3199         | 1328              | 3              | 3             |
| 3832         | 1630              | 3              | 3             |
| 2843         | 913               | 3              | 3             |
| 3477         | 1369              | 3              | 3             |
| 4281         | 1657              | 3              | 3             |
| 7727         | 3026              | 3              | 3             |
| 2903         | 851               | 3              | 3             |
| 7374         | 2174              | 3              | 3             |
| 4250         | 1411              | 3              | 3             |
| 4587         | 1506              | 3              | 3             |
| 3699         | 1284              | 3              | 3             |
| 3028         | 1148              | 3              | 3             |
| 6017         | 1868              | 3              | 3             |
| 2234         | 815               | 3              | 3             |
| 3711         | 1648              | 3              | 3             |
| 7537         | 3101              | 3              | 3             |
| 3750         | 1509              | 3              | 3             |
| 3738         | 1649              | 3              | 3             |

| NUCLEUS AREA | FUORESCENT SIGNAL | PASSAGE NUMBER | EXPERIMENT ID |
|--------------|-------------------|----------------|---------------|
| 3962         | 1591              | 3              | 3             |
| 5289         | 1781              | 3              | 3             |
| 4641         | 1551              | 3              | 3             |
| 3887         | 1255              | 3              | 3             |
| 7861         | 2638              | 3              | 3             |
| 3829         | 1306              | 3              | 3             |
| 7359         | 2333              | 3              | 3             |
| 4298         | 1646              | 3              | 3             |
| 4815         | 1987              | 3              | 3             |
| 2423         | 976               | 3              | 3             |
| 4346         | 2015              | 3              | 3             |
| 5696         | 2953              | 3              | 3             |
| 10197        | 4395              | 3              | 3             |
| 2459         | 1263              | 3              | 3             |
| 4407         | 2112              | 3              | 3             |
| 3419         | 1736              | 3              | 3             |
| 3523         | 1958              | 3              | 3             |
| 3428         | 1467              | 3              | 3             |
| 2876         | 1236              | 3              | 3             |
| 4637         | 1862              | 3              | 3             |
| 6920         | 2561              | 3              | 3             |
| 2628         | 1482              | 3              | 3             |
| 3802         | 2055              | 3              | 3             |
| 3065         | 1505              | 3              | 3             |
| 3766         | 1936              | 3              | 3             |
| 3625         | 1765              | 3              | 3             |
| 4516         | 1984              | 3              | 3             |
| 4423         | 2006              | 3              | 3             |
| 2937         | 1305              | 3              | 3             |
| 4258         | 1918              | 3              | 3             |
| 3740         | 1885              | 3              | 3             |
| 3307         | 2056              | 3              | 3             |
| 4642         | 2204              | 3              | 3             |
| 2018         | 1107              | 3              | 3             |
| 4281         | 593               | 3              | 3             |
| 5536         | 644               | 3              | 3             |
| 4257         | 792               | 3              | 3             |
| 4119         | 610               | 3              | 3             |
| 4455         | 912               | 3              | 3             |
| 4622         | 1060              | 3              | 3             |
| 5385         | 1271              | 3              | 3             |
| 4130         | 827               | 3              | 3             |
| 5405         | 882               | 3              | 3             |
| 5707         | 908               | 3              | 3             |
| 6404         | 954               | 3              | 3             |
| 3802         | 793               | 3              | 3             |
| 4594         | 740               | 3              | 3             |
| 5831         | 1134              | 3              | 3             |



| NUCLEUS AREA | FUORESCENT SIGNAL | PASSAGE NUMBER | EXPERIMENT ID |
|--------------|-------------------|----------------|---------------|
| 5399         | 1233              | 3              | 3             |
| 4698         | 918               | 3              | 3             |
| 4248         | 942               | 3              | 3             |
| 2977         | 739               | 3              | 3             |
| 3123         | 826               | 3              | 3             |
| 2727         | 807               | 3              | 3             |
| 4455         | 1006              | 3              | 3             |
| 5299         | 1000              | 3              | 3             |
| 4543         | 945               | 3              | 3             |
| 4389         | 1024              | 3              | 3             |
| 2791         | 911               | 3              | 3             |
| 5405         | 1170              | 3              | 3             |
| 6033         | 1439              | 3              | 3             |
| 4209         | 1300              | 3              | 3             |
| 4248         | 1096              | 3              | 3             |
| 5871         | 1037              | 3              | 3             |
| 6190         | 1369              | 3              | 3             |
| 3840         | 797               | 3              | 3             |
| 4319         | 913               | 3              | 3             |
| 6751         | 1885              | 3              | 3             |
| 4589         | 1289              | 3              | 3             |
| 12028        | 3461              | 3              | 3             |
| 5589         | 1488              | 3              | 3             |
| 2838         | 889               | 3              | 3             |
| 1988         | 421               | 3              | 3             |
| 5342         | 1032              | 3              | 3             |
| 6193         | 1355              | 3              | 3             |
| 2299         | 663               | 3              | 3             |
| 4132         | 936               | 3              | 3             |
| 3283         | 965               | 3              | 3             |
| 6494         | 1360              | 3              | 3             |
| 3825         | 794               | 3              | 3             |
| 4234         | 1111              | 3              | 3             |
| 6354         | 1287              | 3              | 3             |
| 4615         | 1101              | 3              | 3             |
| 3842         | 948               | 3              | 3             |
| 2820         | 765               | 3              | 3             |
| 4305         | 1353              | 3              | 3             |
| 4123         | 1168              | 3              | 3             |
| 3254         | 1060              | 3              | 3             |
| 4059         | 1219              | 3              | 3             |
| 5253         | 1532              | 3              | 3             |
| 5273         | 1088              | 3              | 3             |
| 6258         | 1132              | 3              | 3             |
| 4066         | 969               | 3              | 3             |
| 2376         | 513               | 3              | 3             |
| 4212         | 1081              | 3              | 3             |
| 4952         | 1254              | 3              | 3             |

| NUCLEUS AREA | FUORESCENT SIGNAL | PASSAGE NUMBER | EXPERIMENT ID |
|--------------|-------------------|----------------|---------------|
| 4580         | 1177              | 3              | 3             |
| 3380         | 1136              | 3              | 3             |
| 5575         | 1465              | 3              | 3             |
| 5878         | 1464              | 3              | 3             |
| 4470         | 827               | 3              | 3             |
| 5262         | 884               | 3              | 3             |
| 3371         | 780               | 3              | 3             |
| 2327         | 482               | 3              | 3             |
| 5644         | 1004              | 3              | 3             |
| 3844         | 971               | 3              | 3             |
| 5237         | 1128              | 3              | 3             |
| 5122         | 1291              | 3              | 3             |
| 3751         | 928               | 3              | 3             |
| 3550         | 850               | 3              | 3             |
| 4589         | 1167              | 3              | 3             |
| 4785         | 1136              | 3              | 3             |
| 3290         | 939               | 3              | 3             |
| 4061         | 1072              | 3              | 3             |
| 4135         | 1283              | 3              | 3             |
| 5348         | 1457              | 3              | 3             |
| 2699         | 673               | 3              | 3             |
| 4053         | 1191              | 3              | 3             |
| 4513         | 1322              | 3              | 3             |
| 2796         | 829               | 3              | 3             |
| 3348         | 744               | 3              | 3             |
| 3874         | 927               | 3              | 3             |
| 5770         | 1383              | 3              | 3             |
| 3261         | 818               | 3              | 3             |
| 3482         | 915               | 3              | 3             |
| 2439         | 666               | 3              | 3             |
| 4546         | 1301              | 3              | 3             |
| 6955         | 2004              | 3              | 3             |
| 10836        | 3042              | 3              | 3             |
| 5495         | 1577              | 3              | 3             |
| 5155         | 1390              | 3              | 3             |
| 6598         | 1571              | 3              | 3             |
| 4066         | 940               | 3              | 3             |
| 8039         | 2078              | 3              | 3             |
| 5811         | 1512              | 3              | 3             |
| 5290         | 1775              | 3              | 3             |
| 3915         | 1063              | 3              | 3             |
| 3309         | 749               | 3              | 3             |
| 2706         | 947               | 3              | 3             |
| 4524         | 1516              | 3              | 3             |
| 5060         | 1603              | 3              | 3             |
| 4267         | 1133              | 3              | 3             |
| 4409         | 1198              | 3              | 3             |
| 4546         | 1262              | 3              | 3             |

| NUCLEUS AREA | FUORESCENT SIGNAL | PASSAGE NUMBER | EXPERIMENT ID |
|--------------|-------------------|----------------|---------------|
| 4930         | 1352              | 3              | 3             |
| 4341         | 1132              | 3              | 3             |
| 4475         | 1286              | 3              | 3             |
| 3681         | 923               | 3              | 3             |
| 4358         | 700               | 3              | 3             |
| 8233         | 1593              | 3              | 3             |
| 4771         | 610               | 3              | 3             |
| 6782         | 1339              | 3              | 3             |
| 5583         | 1236              | 3              | 3             |
| 5604         | 1167              | 3              | 3             |
| 4014         | 744               | 3              | 3             |
| 4405         | 1118              | 3              | 3             |
| 5267         | 1612              | 13             | 1             |
| 2554         | 998               | 13             | 1             |
| 3485         | 1340              | 13             | 1             |
| 3125         | 1146              | 13             | 1             |
| 8012         | 2625              | 13             | 1             |
| 2166         | 1098              | 13             | 1             |
| 2004         | 783               | 13             | 1             |
| 9940         | 4628              | 13             | 1             |
| 2081         | 615               | 13             | 1             |
| 4306         | 1157              | 13             | 1             |
| 2881         | 939               | 13             | 1             |
| 2257         | 1902              | 13             | 1             |
| 4409         | 2066              | 13             | 1             |
| 22000        | 5962              | 13             | 1             |
| 5659         | 1876              | 13             | 1             |
| 16549        | 3345              | 13             | 1             |
| 3743         | 1701              | 13             | 1             |
| 2764         | 423               | 13             | 1             |
| 2478         | 1173              | 13             | 1             |
| 10576        | 4214              | 13             | 1             |
| 7616         | 1633              | 13             | 1             |
| 4100         | 2190              | 13             | 1             |
| 8212         | 3178              | 13             | 1             |
| 4999         | 1097              | 13             | 1             |
| 7382         | 1815              | 13             | 1             |
| 9006         | 3244              | 13             | 1             |
| 3290         | 1022              | 13             | 1             |
| 2058         | 1222              | 13             | 1             |
| 10479        | 3019              | 13             | 1             |
| 5635         | 2228              | 13             | 1             |
| 3962         | 736               | 13             | 1             |
| 9528         | 3143              | 13             | 1             |
| 6717         | 1865              | 13             | 1             |
| 6866         | 2305              | 13             | 1             |
| 7514         | 2838              | 13             | 1             |
| 2054         | 1047              | 13             | 1             |

| NUCLEUS AREA | FUORESCENT SIGNAL | PASSAGE NUMBER | EXPERIMENT ID |
|--------------|-------------------|----------------|---------------|
| 12160        | 4833              | 13             | 1             |
| 2161         | 596               | 13             | 1             |
| 5834         | 2642              | 13             | 1             |
| 6141         | 1935              | 13             | 1             |
| 2336         | 630               | 13             | 1             |
| 4124         | 1883              | 13             | 1             |
| 3752         | 2005              | 13             | 1             |
| 6214         | 2502              | 13             | 1             |
| 4626         | 1725              | 13             | 1             |
| 11527        | 4250              | 13             | 1             |
| 5334         | 1463              | 13             | 1             |
| 5419         | 2031              | 13             | 1             |
| 4408         | 2114              | 13             | 1             |
| 5778         | 2705              | 13             | 1             |
| 4846         | 1944              | 13             | 1             |
| 6645         | 2542              | 13             | 1             |
| 8361         | 3016              | 13             | 1             |
| 5818         | 2413              | 13             | 1             |
| 4603         | 1986              | 13             | 1             |
| 4572         | 1985              | 13             | 1             |
| 5921         | 2002              | 13             | 1             |
| 7303         | 3039              | 13             | 1             |
| 5858         | 2122              | 13             | 1             |
| 6864         | 2189              | 13             | 1             |
| 3098         | 1067              | 13             | 1             |
| 7608         | 5978              | 13             | 1             |
| 4927         | 1952              | 13             | 1             |
| 5799         | 1286              | 13             | 1             |
| 7327         | 2203              | 13             | 1             |
| 10780        | 4736              | 13             | 1             |
| 2597         | 947               | 13             | 1             |
| 3488         | 1683              | 13             | 1             |
| 2462         | 885               | 13             | 1             |
| 8837         | 3441              | 13             | 1             |
| 9360         | 3283              | 13             | 1             |
| 3380         | 1017              | 13             | 1             |
| 6657         | 2641              | 13             | 1             |
| 5833         | 2245              | 13             | 1             |
| 9400         | 3202              | 13             | 1             |
| 2396         | 1012              | 13             | 1             |
| 3449         | 1107              | 13             | 1             |
| 3820         | 1182              | 13             | 1             |
| 5208         | 2530              | 13             | 1             |
| 4507         | 1991              | 13             | 1             |
| 5638         | 2074              | 13             | 1             |
| 5430         | 1610              | 13             | 1             |
| 3452         | 1290              | 13             | 1             |
| 9446         | 2628              | 13             | 1             |

| NUCLEUS AREA | FUORESCENT SIGNAL | PASSAGE NUMBER | EXPERIMENT ID |
|--------------|-------------------|----------------|---------------|
| 9888         | 6906              | 13             | 1             |
| 3492         | 1699              | 13             | 1             |
| 4564         | 2733              | 13             | 1             |
| 12661        | 4705              | 13             | 1             |
| 9305         | 3668              | 13             | 1             |
| 4405         | 1366              | 13             | 1             |
| 10236        | 4029              | 13             | 1             |
| 6149         | 2839              | 13             | 1             |
| 3119         | 1586              | 13             | 1             |
| 6743         | 2291              | 13             | 1             |
| 11502        | 3305              | 13             | 1             |
| 3994         | 1491              | 13             | 1             |
| 7760         | 3213              | 13             | 1             |
| 3698         | 1724              | 13             | 1             |
| 3793         | 1010              | 13             | 1             |
| 3396         | 1547              | 13             | 1             |
| 4583         | 1668              | 13             | 1             |
| 11700        | 4120              | 13             | 1             |
| 7271         | 3032              | 13             | 1             |
| 3914         | 1333              | 13             | 1             |
| 5148         | 2536              | 13             | 1             |
| 3407         | 1673              | 13             | 1             |
| 4122         | 1595              | 13             | 1             |
| 3729         | 1913              | 13             | 1             |
| 8329         | 3843              | 13             | 1             |
| 5245         | 2363              | 13             | 1             |
| 8727         | 3577              | 13             | 1             |
| 3921         | 2042              | 13             | 1             |
| 13928        | 5171              | 13             | 1             |
| 5302         | 1928              | 13             | 1             |
| 10756        | 4627              | 13             | 1             |
| 3912         | 1586              | 13             | 1             |
| 3183         | 1050              | 13             | 1             |
| 6013         | 4439              | 13             | 1             |
| 3737         | 1738              | 13             | 1             |
| 5865         | 1828              | 13             | 1             |
| 5246         | 2449              | 13             | 1             |
| 11077        | 4665              | 13             | 1             |
| 7560         | 3664              | 13             | 1             |
| 11337        | 3677              | 13             | 1             |
| 5419         | 1504              | 13             | 1             |
| 7883         | 3280              | 13             | 1             |
| 6736         | 2112              | 13             | 1             |
| 3049         | 1755              | 13             | 1             |
| 5183         | 2203              | 13             | 1             |
| 3907         | 1759              | 13             | 1             |
| 5800         | 1765              | 13             | 1             |
| 3849         | 1585              | 13             | 1             |

| NUCLEUS AREA | FUORESCENT SIGNAL | PASSAGE NUMBER | EXPERIMENT ID |
|--------------|-------------------|----------------|---------------|
| 3763         | 1561              | 13             | 1             |
| 4617         | 1789              | 13             | 1             |
| 6934         | 2916              | 13             | 1             |
| 2057         | 653               | 13             | 1             |
| 4680         | 1955              | 13             | 1             |
| 6952         | 2752              | 13             | 1             |
| 5187         | 2784              | 13             | 1             |
| 6277         | 1779              | 13             | 1             |
| 10728        | 3774              | 13             | 1             |
| 2037         | 1054              | 13             | 1             |
| 2743         | 1396              | 13             | 1             |
| 5015         | 2660              | 13             | 1             |
| 2932         | 1184              | 13             | 1             |
| 5423         | 2887              | 13             | 1             |
| 3681         | 1586              | 13             | 1             |
| 3873         | 1974              | 13             | 1             |
| 10777        | 7484              | 13             | 1             |
| 2395         | 766               | 13             | 1             |
| 5375         | 2393              | 13             | 1             |
| 10931        | 5376              | 13             | 1             |
| 2571         | 790               | 13             | 1             |
| 5022         | 1907              | 13             | 1             |
| 4968         | 2250              | 13             | 1             |
| 4070         | 2032              | 13             | 1             |
| 5770         | 1542              | 13             | 1             |
| 10270        | 4639              | 13             | 1             |
| 3567         | 1807              | 13             | 1             |
| 5339         | 1769              | 13             | 1             |
| 2656         | 1389              | 13             | 1             |
| 8640         | 3216              | 13             | 1             |
| 11546        | 4878              | 13             | 1             |
| 10063        | 4413              | 13             | 1             |
| 10725        | 4350              | 13             | 1             |
| 6952         | 2677              | 13             | 1             |
| 5630         | 1684              | 13             | 1             |
| 5104         | 2834              | 13             | 1             |
| 12222        | 5736              | 13             | 1             |
| 7094         | 2378              | 13             | 1             |
| 10208        | 4737              | 13             | 1             |
| 12729        | 5071              | 13             | 1             |
| 5624         | 1720              | 13             | 1             |
| 9583         | 5523              | 13             | 1             |
| 5641         | 2021              | 13             | 1             |
| 7265         | 4365              | 13             | 1             |
| 10014        | 3944              | 13             | 1             |
| 5710         | 2005              | 13             | 1             |
| 6369         | 3670              | 13             | 1             |
| 4978         | 2338              | 13             | 1             |

| NUCLEUS AREA | FUORESCENT SIGNAL | PASSAGE NUMBER | EXPERIMENT ID |
|--------------|-------------------|----------------|---------------|
| 5318         | 2024              | 13             | 1             |
| 5768         | 2745              | 13             | 1             |
| 4111         | 2109              | 13             | 1             |
| 6953         | 2921              | 13             | 1             |
| 9126         | 3615              | 13             | 1             |
| 6287         | 2350              | 13             | 1             |
| 8689         | 3214              | 13             | 1             |
| 2168         | 1327              | 13             | 1             |
| 6086         | 2175              | 13             | 1             |
| 2219         | 916               | 13             | 1             |
| 18112        | 7408              | 13             | 1             |
| 5044         | 2411              | 13             | 1             |
| 5770         | 2291              | 13             | 1             |
| 10390        | 4855              | 13             | 1             |
| 10096        | 3020              | 13             | 1             |
| 4011         | 1653              | 13             | 1             |
| 10320        | 4362              | 13             | 1             |
| 8144         | 3759              | 13             | 1             |
| 3055         | 1608              | 13             | 1             |
| 3423         | 1308              | 13             | 1             |
| 12044        | 4964              | 13             | 1             |
| 7653         | 3604              | 13             | 1             |
| 5914         | 1767              | 13             | 1             |
| 5469         | 2256              | 13             | 1             |
| 6975         | 2637              | 13             | 1             |
| 3699         | 1928              | 13             | 1             |
| 7287         | 2433              | 13             | 1             |
| 10604        | 3609              | 13             | 1             |
| 8715         | 3889              | 13             | 1             |
| 5663         | 2163              | 13             | 1             |
| 8915         | 3117              | 13             | 1             |
| 6697         | 2720              | 13             | 1             |
| 9391         | 3279              | 13             | 1             |
| 5080         | 2255              | 13             | 1             |
| 5753         | 2158              | 13             | 1             |
| 4566         | 1949              | 13             | 1             |
| 7410         | 3107              | 13             | 1             |
| 12230        | 5001              | 13             | 1             |
| 4261         | 2371              | 13             | 1             |
| 5781         | 2180              | 13             | 1             |
| 4001         | 2020              | 13             | 1             |
| 15575        | 8114              | 13             | 1             |
| 7225         | 3637              | 13             | 1             |
| 3508         | 964               | 13             | 1             |
| 13916        | 6059              | 13             | 1             |
| 12669        | 5819              | 13             | 1             |
| 4030         | 1806              | 13             | 1             |
| 6828         | 2911              | 13             | 1             |

| NUCLEUS AREA | FUORESCENT SIGNAL | PASSAGE NUMBER | EXPERIMENT ID |
|--------------|-------------------|----------------|---------------|
| 6736         | 2231              | 13             | 1             |
| 3505         | 1175              | 13             | 1             |
| 12167        | 4766              | 13             | 1             |
| 8602         | 4794              | 13             | 1             |
| 6223         | 2711              | 13             | 1             |
| 7032         | 2190              | 13             | 1             |
| 5714         | 2284              | 13             | 1             |
| 5350         | 1815              | 13             | 1             |
| 7484         | 2918              | 13             | 1             |
| 4125         | 1834              | 13             | 1             |
| 5047         | 2632              | 13             | 1             |
| 9429         | 3905              | 13             | 1             |
| 3556         | 1496              | 13             | 1             |
| 8348         | 3755              | 13             | 1             |
| 9143         | 4365              | 13             | 1             |
| 3757         | 1324              | 13             | 1             |
| 9629         | 3917              | 13             | 1             |
| 6433         | 3304              | 13             | 1             |
| 6810         | 3062              | 13             | 1             |
| 6724         | 2040              | 13             | 1             |
| 3341         | 1487              | 13             | 1             |
| 2500         | 1822              | 13             | 1             |
| 5372         | 3216              | 13             | 1             |
| 7965         | 4340              | 13             | 1             |
| 15701        | 6557              | 13             | 1             |
| 5208         | 1868              | 13             | 1             |
| 7009         | 2310              | 13             | 1             |
| 3818         | 1857              | 13             | 1             |
| 5931         | 2515              | 13             | 1             |
| 2501         | 1340              | 13             | 1             |
| 30634        | 13794             | 13             | 1             |
| 3004         | 1489              | 13             | 1             |
| 3363         | 1572              | 13             | 1             |
| 6878         | 2815              | 13             | 1             |
| 6049         | 2421              | 13             | 1             |
| 7655         | 2708              | 13             | 1             |
| 6717         | 2157              | 13             | 1             |
| 4948         | 2173              | 13             | 1             |
| 13945        | 6940              | 13             | 1             |
| 6132         | 2710              | 13             | 1             |
| 8371         | 3261              | 13             | 1             |
| 4270         | 2035              | 13             | 1             |
| 8413         | 5219              | 13             | 1             |
| 8446         | 3077              | 13             | 1             |
| 5756         | 2375              | 13             | 1             |
| 15810        | 12045             | 13             | 1             |
| 11279        | 7189              | 13             | 1             |
| 9405         | 4821              | 13             | 1             |



| NUCLEUS AREA | FUORESCENT SIGNAL | PASSAGE NUMBER | EXPERIMENT ID |
|--------------|-------------------|----------------|---------------|
| 9199         | 2929              | 13             | 1             |
| 5176         | 3512              | 13             | 1             |
| 4985         | 1951              | 13             | 1             |
| 9751         | 4133              | 13             | 1             |
| 7173         | 3557              | 13             | 1             |
| 8427         | 2902              | 13             | 1             |
| 7178         | 3536              | 13             | 1             |
| 4714         | 2116              | 13             | 1             |
| 7782         | 2572              | 13             | 1             |
| 3841         | 1739              | 13             | 1             |
| 7045         | 2188              | 13             | 1             |
| 8367         | 3469              | 13             | 1             |
| 8049         | 3233              | 13             | 1             |
| 5225         | 1605              | 13             | 1             |
| 14516        | 9967              | 13             | 1             |
| 5120         | 2199              | 13             | 1             |
| 4828         | 2638              | 13             | 1             |
| 6064         | 2696              | 13             | 1             |
| 3836         | 2192              | 13             | 1             |
| 2942         | 1594              | 13             | 1             |
| 4687         | 2218              | 13             | 1             |
| 9867         | 3687              | 13             | 1             |
| 3714         | 1525              | 13             | 1             |
| 6978         | 2909              | 13             | 1             |
| 9312         | 3959              | 13             | 1             |
| 4521         | 2136              | 13             | 1             |
| 6526         | 2588              | 13             | 1             |
| 6104         | 2415              | 13             | 1             |
| 4790         | 2465              | 13             | 1             |
| 12308        | 4947              | 13             | 1             |
| 7861         | 3840              | 13             | 1             |
| 5608         | 2668              | 13             | 1             |
| 4333         | 1856              | 13             | 1             |
| 5295         | 2915              | 13             | 1             |
| 7163         | 3275              | 13             | 1             |
| 8729         | 4053              | 13             | 1             |
| 7854         | 3773              | 13             | 1             |
| 7709         | 3276              | 13             | 1             |
| 4922         | 2353              | 13             | 1             |
| 7825         | 3310              | 13             | 1             |
| 6874         | 2807              | 13             | 1             |
| 8244         | 3480              | 13             | 1             |
| 6508         | 2347              | 13             | 1             |
| 8341         | 3835              | 13             | 1             |
| 7768         | 2988              | 13             | 1             |
| 6015         | 2352              | 13             | 1             |
| 7039         | 3356              | 13             | 1             |
| 9951         | 4246              | 13             | 1             |

| NUCLEUS AREA | FUORESCENT SIGNAL | PASSAGE NUMBER | EXPERIMENT ID |
|--------------|-------------------|----------------|---------------|
| 7161         | 2274              | 13             | 1             |
| 8658         | 4511              | 13             | 1             |
| 8875         | 3276              | 13             | 1             |
| 5687         | 2896              | 13             | 1             |
| 6638         | 4166              | 13             | 1             |
| 4382         | 2252              | 13             | 1             |
| 6121         | 2960              | 13             | 1             |
| 9611         | 4179              | 13             | 1             |
| 4572         | 2502              | 13             | 1             |
| 7081         | 3393              | 13             | 1             |
| 6770         | 3714              | 13             | 1             |
| 4183         | 1899              | 13             | 1             |
| 6509         | 2697              | 13             | 1             |
| 5404         | 2463              | 13             | 1             |
| 4894         | 2590              | 13             | 1             |
| 8124         | 2805              | 13             | 1             |
| 5744         | 2480              | 13             | 1             |
| 5764         | 2626              | 13             | 1             |
| 7807         | 2668              | 13             | 1             |
| 5811         | 2563              | 13             | 1             |
| 4228         | 2755              | 13             | 1             |
| 5406         | 2703              | 13             | 1             |
| 5772         | 2453              | 13             | 1             |
| 5336         | 1974              | 13             | 1             |
| 6412         | 3266              | 13             | 1             |
| 4909         | 2006              | 13             | 1             |
| 9977         | 4481              | 13             | 1             |
| 3261         | 1228              | 13             | 1             |
| 6709         | 2587              | 13             | 1             |
| 5239         | 2388              | 13             | 1             |
| 5197         | 1840              | 13             | 1             |
| 6067         | 3544              | 13             | 1             |
| 4425         | 2224              | 13             | 1             |
| 3451         | 1749              | 13             | 1             |
| 7548         | 3479              | 13             | 1             |
| 6658         | 3403              | 13             | 1             |
| 3446         | 1443              | 13             | 1             |
| 5236         | 2342              | 13             | 1             |
| 5691         | 1868              | 13             | 1             |
| 8576         | 2997              | 13             | 1             |
| 3571         | 3339              | 13             | 1             |
| 4985         | 2761              | 13             | 1             |
| 5360         | 3339              | 13             | 1             |
| 5127         | 3309              | 13             | 1             |
| 4438         | 1869              | 13             | 1             |
| 10659        | 5474              | 13             | 1             |
| 5608         | 2208              | 13             | 1             |
| 8267         | 3422              | 13             | 1             |

| NUCLEUS AREA | FUORESCENT SIGNAL | PASSAGE NUMBER | EXPERIMENT ID |
|--------------|-------------------|----------------|---------------|
| 13437        | 6868              | 13             | 1             |
| 8006         | 3365              | 13             | 1             |
| 6105         | 2925              | 13             | 1             |
| 14515        | 6712              | 13             | 1             |
| 4480         | 2107              | 13             | 1             |
| 5268         | 2461              | 13             | 1             |
| 6590         | 3701              | 13             | 1             |
| 6616         | 2707              | 13             | 1             |
| 4749         | 2450              | 13             | 1             |
| 5539         | 2295              | 13             | 1             |
| 5093         | 2508              | 13             | 1             |
| 6085         | 1855              | 13             | 1             |
| 6804         | 3050              | 13             | 1             |
| 4741         | 2600              | 13             | 1             |
| 5234         | 2174              | 13             | 1             |
| 4655         | 2415              | 13             | 1             |
| 2801         | 1283              | 13             | 1             |
| 4676         | 1340              | 13             | 1             |
| 5554         | 2179              | 13             | 1             |
| 6312         | 2399              | 13             | 1             |
| 3798         | 2104              | 13             | 1             |
| 5906         | 3258              | 13             | 1             |
| 4865         | 2565              | 13             | 1             |
| 3689         | 2517              | 13             | 1             |
| 14263        | 6261              | 13             | 1             |
| 8637         | 5498              | 13             | 1             |
| 4633         | 1806              | 13             | 1             |
| 2111         | 902               | 13             | 1             |
| 3853         | 1637              | 13             | 1             |
| 6338         | 3108              | 13             | 1             |
| 3833         | 2252              | 13             | 1             |
| 3374         | 1975              | 13             | 1             |
| 5837         | 3462              | 13             | 1             |
| 2609         | 1012              | 13             | 1             |
| 4872         | 2438              | 13             | 1             |
| 4563         | 2132              | 13             | 1             |
| 4282         | 1920              | 13             | 1             |
| 8161         | 4964              | 13             | 3             |
| 8215         | 5322              | 13             | 3             |
| 8996         | 3748              | 13             | 3             |
| 10733        | 7040              | 13             | 3             |
| 7935         | 4135              | 13             | 3             |
| 13293        | 7198              | 13             | 3             |
| 11065        | 6332              | 13             | 3             |
| 7917         | 4446              | 13             | 3             |
| 7573         | 3935              | 13             | 3             |
| 7497         | 4372              | 13             | 3             |
| 16997        | 11221             | 13             | 3             |

| NUCLEUS AREA | FUORESCENT SIGNAL | PASSAGE NUMBER | EXPERIMENT ID |
|--------------|-------------------|----------------|---------------|
| 16051        | 11660             | 13             | 3             |
| 9135         | 5333              | 13             | 3             |
| 8024         | 4257              | 13             | 3             |
| 11649        | 7523              | 13             | 3             |
| 11954        | 8276              | 13             | 3             |
| 9321         | 5888              | 13             | 3             |
| 15989        | 7539              | 13             | 3             |
| 7160         | 2248              | 13             | 3             |
| 7213         | 3949              | 13             | 3             |
| 10153        | 4018              | 13             | 3             |
| 11799        | 6096              | 13             | 3             |
| 10538        | 6229              | 13             | 3             |
| 9539         | 4648              | 13             | 3             |
| 8833         | 6170              | 13             | 3             |
| 13116        | 7395              | 13             | 3             |
| 10088        | 3175              | 13             | 3             |
| 12215        | 3997              | 13             | 3             |
| 11990        | 3773              | 13             | 3             |
| 9934         | 3781              | 13             | 3             |
| 6749         | 2468              | 13             | 3             |
| 12536        | 5860              | 13             | 3             |
| 4934         | 2043              | 13             | 3             |
| 15606        | 7884              | 13             | 3             |
| 7375         | 3098              | 13             | 3             |
| 10893        | 3454              | 13             | 3             |
| 7139         | 2493              | 13             | 3             |
| 12071        | 4641              | 13             | 3             |
| 11413        | 4191              | 13             | 3             |
| 10546        | 2339              | 13             | 3             |
| 7926         | 2422              | 13             | 3             |
| 17199        | 5388              | 13             | 3             |
| 6824         | 3108              | 13             | 3             |
| 12481        | 4655              | 13             | 3             |
| 7414         | 3818              | 13             | 3             |
| 3987         | 1992              | 13             | 3             |
| 5329         | 2823              | 13             | 3             |
| 9227         | 3241              | 13             | 3             |
| 10647        | 5219              | 13             | 3             |
| 12967        | 6486              | 13             | 3             |
| 9208         | 4241              | 13             | 3             |
| 10107        | 4069              | 13             | 3             |
| 22274        | 14424             | 13             | 3             |
| 13257        | 6878              | 13             | 3             |
| 7972         | 3763              | 13             | 3             |
| 14906        | 8621              | 13             | 3             |
| 9648         | 6123              | 13             | 3             |
| 9066         | 5505              | 13             | 3             |
| 13147        | 8100              | 13             | 3             |

| NUCLEUS AREA | FUORESCENT SIGNAL | PASSAGE NUMBER | EXPERIMENT ID |
|--------------|-------------------|----------------|---------------|
| 10997        | 7146              | 13             | 3             |
| 11424        | 7563              | 13             | 3             |
| 8185         | 5112              | 13             | 3             |
| 13352        | 6570              | 13             | 3             |
| 11754        | 6235              | 13             | 3             |
| 8665         | 4381              | 13             | 3             |
| 7027         | 4125              | 13             | 3             |
| 7229         | 3612              | 13             | 3             |
| 4765         | 2224              | 13             | 3             |
| 4480         | 2130              | 13             | 3             |
| 7659         | 4568              | 13             | 3             |
| 8819         | 5846              | 13             | 3             |
| 8951         | 4826              | 13             | 3             |
| 6788         | 3692              | 13             | 3             |
| 12841        | 6288              | 13             | 3             |
| 6917         | 2752              | 13             | 3             |
| 23365        | 15419             | 13             | 3             |
| 8215         | 5272              | 13             | 3             |
| 7470         | 3391              | 13             | 3             |
| 10023        | 5548              | 13             | 3             |
| 9905         | 4044              | 13             | 3             |
| 5939         | 2347              | 13             | 3             |
| 6831         | 3793              | 13             | 3             |
| 6016         | 2083              | 13             | 3             |
| 8344         | 3639              | 13             | 3             |
| 6412         | 2788              | 13             | 3             |
| 26772        | 13290             | 13             | 3             |
| 2681         | 1226              | 13             | 3             |
| 10970        | 5757              | 13             | 3             |
| 7322         | 3131              | 13             | 3             |
| 9540         | 3951              | 13             | 3             |
| 8158         | 4407              | 13             | 3             |
| 9943         | 4178              | 13             | 3             |
| 11493        | 6285              | 13             | 3             |
| 9688         | 5000              | 13             | 3             |
| 8742         | 5776              | 13             | 3             |
| 8284         | 3056              | 13             | 3             |
| 13590        | 6269              | 13             | 3             |
| 12288        | 6647              | 13             | 3             |
| 17648        | 7983              | 13             | 3             |
| 9748         | 4386              | 13             | 3             |
| 9030         | 4496              | 13             | 3             |
| 10627        | 3999              | 13             | 3             |
| 8580         | 4385              | 13             | 3             |
| 7774         | 3152              | 13             | 3             |
| 18095        | 7938              | 13             | 3             |
| 9141         | 4403              | 13             | 3             |
| 9579         | 5379              | 13             | 3             |

| NUCLEUS AREA | FUORESCENT SIGNAL | PASSAGE NUMBER | EXPERIMENT ID |
|--------------|-------------------|----------------|---------------|
| 3560         | 635               | 9              | 4             |
| 2956         | 433               | 9              | 4             |
| 3998         | 492               | 9              | 4             |
| 4352         | 721               | 9              | 4             |
| 5887         | 918               | 9              | 4             |
| 14142        | 4426              | 9              | 4             |
| 4290         | 661               | 9              | 4             |
| 7826         | 1850              | 9              | 4             |
| 3209         | 445               | 9              | 4             |
| 4071         | 834               | 9              | 4             |
| 6370         | 1724              | 9              | 4             |
| 9010         | 1878              | 9              | 4             |
| 5407         | 1139              | 9              | 4             |
| 5261         | 1278              | 9              | 4             |
| 5059         | 1149              | 9              | 4             |
| 2923         | 506               | 9              | 4             |
| 4369         | 864               | 9              | 4             |
| 7726         | 1465              | 9              | 4             |
| 9362         | 1741              | 9              | 4             |
| 5085         | 1093              | 9              | 4             |
| 7966         | 2251              | 9              | 4             |
| 3613         | 777               | 9              | 4             |
| 10948        | 2054              | 9              | 4             |
| 7020         | 1576              | 9              | 4             |
| 5517         | 1011              | 9              | 4             |
| 8259         | 1578              | 9              | 4             |
| 8149         | 1718              | 9              | 4             |
| 4771         | 1133              | 9              | 4             |
| 9474         | 2648              | 9              | 4             |
| 8123         | 2090              | 9              | 4             |
| 5102         | 1100              | 9              | 4             |
| 9111         | 2590              | 9              | 4             |
| 8772         | 2312              | 9              | 4             |
| 7764         | 1742              | 9              | 4             |
| 5274         | 983               | 9              | 4             |
| 5289         | 1174              | 9              | 4             |
| 5403         | 1323              | 9              | 4             |
| 8186         | 1490              | 9              | 4             |
| 3741         | 615               | 9              | 4             |
| 7470         | 2117              | 9              | 4             |
| 6961         | 1435              | 9              | 4             |
| 4848         | 1021              | 9              | 4             |
| 4536         | 925               | 9              | 4             |
| 7707         | 1659              | 9              | 4             |
| 4509         | 915               | 9              | 4             |
| 5161         | 1003              | 9              | 4             |
| 3132         | 728               | 9              | 4             |
| 4507         | 1121              | 9              | 4             |

| NUCLEUS AREA | FUORESCENT SIGNAL | PASSAGE NUMBER | EXPERIMENT ID |
|--------------|-------------------|----------------|---------------|
| 7542         | 1990              | 9              | 4             |
| 7333         | 1322              | 9              | 4             |
| 7204         | 1708              | 9              | 4             |
| 6920         | 1969              | 9              | 4             |
| 3961         | 3644              | 9              | 4             |
| 3280         | 2090              | 9              | 4             |
| 5327         | 1307              | 9              | 4             |
| 10451        | 3346              | 9              | 4             |
| 6214         | 1036              | 9              | 4             |
| 1973         | 338               | 9              | 4             |
| 4458         | 910               | 9              | 4             |
| 8468         | 1871              | 9              | 4             |
| 6659         | 1387              | 9              | 4             |
| 4662         | 989               | 9              | 4             |
| 26592        | 7104              | 9              | 4             |
| 4669         | 1067              | 9              | 4             |
| 4796         | 995               | 9              | 4             |
| 3325         | 3032              | 9              | 4             |
| 5300         | 1080              | 9              | 4             |
| 6395         | 1587              | 9              | 4             |
| 6830         | 1927              | 9              | 4             |
| 7801         | 2087              | 9              | 4             |
| 5996         | 1534              | 9              | 4             |
| 6541         | 1774              | 9              | 4             |
| 9296         | 2761              | 9              | 4             |
| 8431         | 3412              | 9              | 4             |
| 8033         | 3239              | 9              | 4             |
| 5592         | 1273              | 9              | 4             |
| 3608         | 907               | 9              | 4             |
| 8209         | 1952              | 9              | 4             |
| 12992        | 6611              | 9              | 4             |
| 13404        | 5248              | 9              | 4             |
| 5759         | 1044              | 9              | 4             |
| 8986         | 1828              | 9              | 4             |
| 4329         | 956               | 9              | 4             |
| 4407         | 998               | 9              | 4             |
| 4780         | 779               | 9              | 4             |
| 4587         | 1173              | 9              | 4             |
| 5043         | 893               | 9              | 4             |
| 4300         | 730               | 9              | 4             |
| 6020         | 1821              | 9              | 4             |
| 26094        | 12459             | 9              | 4             |
| 3476         | 740               | 9              | 4             |
| 6542         | 2379              | 9              | 4             |
| 6175         | 2343              | 9              | 4             |
| 4916         | 1167              | 9              | 4             |
| 6838         | 1236              | 9              | 4             |
| 5828         | 1633              | 9              | 4             |

| NUCLEUS AREA | FUORESCENT SIGNAL | PASSAGE NUMBER | EXPERIMENT ID |
|--------------|-------------------|----------------|---------------|
| 3641         | 636               | 9              | 4             |
| 5944         | 1259              | 9              | 4             |
| 5572         | 1440              | 9              | 4             |
| 4052         | 879               | 9              | 4             |
| 4164         | 920               | 9              | 4             |
| 6086         | 1117              | 9              | 4             |
| 6776         | 1977              | 9              | 4             |
| 6733         | 1794              | 9              | 4             |
| 8890         | 2153              | 9              | 4             |
| 5330         | 1307              | 9              | 4             |
| 3578         | 654               | 9              | 4             |
| 27410        | 11234             | 9              | 4             |
| 4241         | 1635              | 9              | 4             |
| 5918         | 1159              | 9              | 4             |
| 6519         | 1231              | 9              | 4             |
| 8732         | 3483              | 9              | 4             |
| 3428         | 861               | 9              | 4             |
| 5473         | 1415              | 9              | 4             |
| 6989         | 1820              | 9              | 4             |
| 5959         | 998               | 9              | 4             |
| 4100         | 688               | 9              | 4             |
| 4427         | 935               | 9              | 4             |
| 2107         | 449               | 9              | 4             |
| 5326         | 975               | 9              | 4             |
| 6622         | 1631              | 9              | 4             |
| 6395         | 1485              | 9              | 4             |
| 8765         | 1879              | 9              | 4             |
| 4609         | 1038              | 9              | 4             |
| 2783         | 445               | 9              | 4             |
| 5122         | 1105              | 9              | 4             |
| 10530        | 3762              | 9              | 4             |
| 6567         | 2101              | 9              | 4             |
| 4113         | 1578              | 9              | 4             |
| 8412         | 2004              | 9              | 4             |
| 5825         | 1208              | 9              | 4             |
| 8502         | 3571              | 9              | 4             |
| 3325         | 898               | 9              | 4             |
| 5365         | 1555              | 9              | 4             |
| 9310         | 2896              | 9              | 4             |
| 7222         | 2644              | 9              | 4             |
| 7140         | 2634              | 9              | 4             |
| 9913         | 3376              | 9              | 4             |
| 6847         | 2147              | 9              | 4             |
| 5068         | 962               | 9              | 4             |
| 3889         | 896               | 9              | 4             |
| 3732         | 882               | 9              | 4             |
| 11411        | 5374              | 9              | 4             |
| 5692         | 1498              | 9              | 4             |



| NUCLEUS AREA | FUORESCENT SIGNAL | PASSAGE NUMBER | EXPERIMENT ID |
|--------------|-------------------|----------------|---------------|
| 7392         | 2440              | 9              | 4             |
| 4424         | 947               | 9              | 4             |
| 10641        | 2460              | 9              | 4             |
| 5414         | 1845              | 9              | 4             |
| 17690        | 5531              | 9              | 4             |
| 6692         | 2089              | 9              | 4             |
| 6149         | 1928              | 9              | 4             |
| 5428         | 2126              | 9              | 4             |
| 5650         | 2215              | 9              | 4             |
| 7618         | 1793              | 9              | 4             |
| 12538        | 4019              | 9              | 4             |
| 3136         | 560               | 9              | 4             |
| 11963        | 3295              | 9              | 4             |
| 11591        | 4331              | 9              | 4             |
| 3649         | 1036              | 9              | 4             |
| 8523         | 2344              | 9              | 4             |
| 8422         | 2233              | 9              | 4             |
| 3461         | 901               | 9              | 4             |
| 10275        | 2901              | 9              | 4             |
| 7610         | 1566              | 9              | 4             |
| 4686         | 1018              | 9              | 4             |
| 11298        | 4064              | 9              | 4             |
| 5315         | 2107              | 9              | 4             |
| 8352         | 1614              | 9              | 4             |
| 3888         | 1085              | 9              | 4             |
| 4610         | 1326              | 9              | 4             |
| 3667         | 980               | 9              | 4             |
| 7062         | 2511              | 9              | 4             |
| 4755         | 1315              | 9              | 4             |
| 7315         | 2566              | 9              | 4             |
| 7463         | 1904              | 9              | 4             |
| 10149        | 2343              | 9              | 4             |
| 13882        | 3979              | 9              | 4             |
| 6809         | 1944              | 9              | 4             |
| 10441        | 2681              | 9              | 4             |
| 7169         | 2242              | 9              | 4             |
| 8492         | 3015              | 9              | 4             |
| 6657         | 2055              | 9              | 4             |
| 7243         | 1846              | 9              | 4             |
| 8696         | 2640              | 9              | 4             |
| 6318         | 1428              | 9              | 4             |
| 5822         | 1664              | 9              | 4             |
| 12545        | 4279              | 9              | 4             |
| 3559         | 798               | 9              | 4             |
| 3670         | 1252              | 9              | 4             |
| 8507         | 2189              | 9              | 4             |
| 4058         | 1014              | 9              | 4             |
| 7082         | 2612              | 9              | 4             |

| NUCLEUS AREA | FUORESCENT SIGNAL | PASSAGE NUMBER | EXPERIMENT ID |
|--------------|-------------------|----------------|---------------|
| 8422         | 2035              | 9              | 4             |
| 5167         | 1218              | 9              | 4             |
| 10309        | 3660              | 9              | 4             |
| 4767         | 974               | 9              | 4             |
| 12374        | 2949              | 9              | 4             |
| 6100         | 1482              | 9              | 4             |
| 9306         | 2594              | 9              | 4             |
| 8827         | 1503              | 9              | 4             |
| 4610         | 1331              | 9              | 4             |
| 9098         | 2874              | 9              | 4             |
| 13417        | 4294              | 9              | 4             |
| 3816         | 1187              | 9              | 4             |
| 8398         | 3029              | 9              | 4             |
| 8156         | 2906              | 9              | 4             |
| 7380         | 2579              | 9              | 4             |
| 6873         | 1827              | 9              | 4             |
| 8449         | 3366              | 9              | 4             |
| 2204         | 564               | 9              | 4             |
| 6694         | 2088              | 9              | 4             |
| 7238         | 1632              | 9              | 4             |
| 3241         | 923               | 9              | 4             |
| 4156         | 1267              | 9              | 4             |
| 5796         | 1805              | 9              | 4             |
| 7099         | 1565              | 9              | 4             |
| 8563         | 2116              | 9              | 4             |
| 7214         | 1166              | 9              | 4             |
| 7803         | 1236              | 9              | 4             |
| 4832         | 1477              | 9              | 4             |
| 7388         | 1927              | 9              | 4             |
| 5098         | 1653              | 9              | 4             |
| 7244         | 1117              | 9              | 4             |
| 7706         | 1614              | 9              | 4             |
| 5384         | 1176              | 9              | 4             |
| 4158         | 1886              | 9              | 4             |
| 5789         | 1215              | 9              | 4             |
| 7889         | 1582              | 9              | 4             |
| 5179         | 4175              | 9              | 4             |
| 5388         | 1150              | 9              | 4             |
| 6482         | 1479              | 9              | 4             |
| 8574         | 4513              | 9              | 4             |
| 7111         | 3270              | 9              | 4             |
| 9763         | 1492              | 9              | 4             |
| 10398        | 4022              | 9              | 4             |
| 10652        | 4520              | 9              | 4             |
| 6718         | 1930              | 9              | 4             |
| 6202         | 1866              | 9              | 4             |
| 7517         | 1531              | 9              | 4             |
| 8643         | 1251              | 9              | 4             |

| NUCLEUS AREA | FUORESCENT SIGNAL | PASSAGE NUMBER | EXPERIMENT ID |
|--------------|-------------------|----------------|---------------|
| 5921         | 1385              | 9              | 4             |
| 6305         | 1798              | 9              | 4             |
| 7484         | 1348              | 9              | 4             |
| 7484         | 2670              | 9              | 4             |
| 7227         | 1585              | 9              | 4             |
| 6349         | 1369              | 9              | 4             |
| 7756         | 1475              | 9              | 4             |
| 6613         | 1391              | 9              | 4             |
| 7274         | 1345              | 9              | 4             |
| 7237         | 1306              | 9              | 4             |
| 6998         | 673               | 9              | 4             |
| 3880         | 487               | 9              | 4             |
| 2506         | 432               | 9              | 4             |
| 2013         | 478               | 9              | 4             |
| 6587         | 2867              | 12             | 4             |
| 6480         | 2442              | 12             | 4             |
| 10500        | 4698              | 12             | 4             |
| 4828         | 1950              | 12             | 4             |
| 5584         | 2077              | 12             | 4             |
| 5868         | 2626              | 12             | 4             |
| 6162         | 2393              | 12             | 4             |
| 5008         | 1545              | 12             | 4             |
| 4714         | 1194              | 12             | 4             |
| 4804         | 1401              | 12             | 4             |
| 7415         | 3044              | 12             | 4             |
| 6398         | 3965              | 12             | 4             |
| 3559         | 2179              | 12             | 4             |
| 7690         | 3053              | 12             | 4             |
| 8004         | 3766              | 12             | 4             |
| 8824         | 4498              | 12             | 4             |
| 7630         | 2818              | 12             | 4             |
| 8412         | 2935              | 12             | 4             |
| 7562         | 3011              | 12             | 4             |
| 7180         | 3418              | 12             | 4             |
| 11970        | 3536              | 12             | 4             |
| 10775        | 4451              | 12             | 4             |
| 11188        | 9337              | 12             | 4             |
| 7794         | 2889              | 12             | 4             |
| 4889         | 1452              | 12             | 4             |
| 7967         | 2458              | 12             | 4             |
| 10157        | 4749              | 12             | 4             |
| 3816         | 1020              | 12             | 4             |
| 7515         | 3292              | 12             | 4             |
| 7968         | 2854              | 12             | 4             |
| 7739         | 4410              | 12             | 4             |
| 6297         | 2313              | 12             | 4             |
| 4469         | 1505              | 12             | 4             |
| 7817         | 5301              | 12             | 4             |

| NUCLEUS AREA | FUORESCENT SIGNAL | PASSAGE NUMBER | EXPERIMENT ID |
|--------------|-------------------|----------------|---------------|
| 6767         | 2499              | 12             | 4             |
| 7703         | 1771              | 12             | 4             |
| 9877         | 1969              | 12             | 4             |
| 6952         | 1698              | 12             | 4             |
| 6019         | 1747              | 12             | 4             |
| 9081         | 4395              | 12             | 4             |
| 8809         | 4496              | 12             | 4             |
| 13983        | 7660              | 12             | 4             |
| 4404         | 1799              | 12             | 4             |
| 4824         | 2039              | 12             | 4             |
| 4572         | 1785              | 12             | 4             |
| 5205         | 2631              | 12             | 4             |
| 5047         | 2379              | 12             | 4             |
| 7627         | 1914              | 12             | 4             |
| 11458        | 4424              | 12             | 4             |
| 7028         | 5017              | 12             | 4             |
| 10472        | 3908              | 12             | 4             |
| 13579        | 9363              | 12             | 4             |
| 6902         | 2971              | 12             | 4             |
| 3667         | 1867              | 12             | 4             |
| 7440         | 3006              | 12             | 4             |
| 9362         | 2930              | 12             | 4             |
| 8139         | 2596              | 12             | 4             |
| 11924        | 4561              | 12             | 4             |
| 12813        | 6017              | 12             | 4             |
| 11423        | 4012              | 12             | 4             |
| 10507        | 6221              | 12             | 4             |
| 8745         | 5167              | 12             | 4             |
| 12066        | 5272              | 12             | 4             |
| 4677         | 1933              | 12             | 4             |
| 9993         | 2660              | 12             | 4             |
| 12090        | 3963              | 12             | 4             |
| 8358         | 1519              | 12             | 4             |
| 5182         | 2499              | 12             | 4             |
| 16061        | 6950              | 12             | 4             |
| 12494        | 7768              | 12             | 4             |
| 3830         | 1714              | 12             | 4             |
| 6534         | 5963              | 12             | 4             |
| 6115         | 4919              | 12             | 4             |
| 7394         | 3117              | 12             | 4             |
| 7381         | 3075              | 12             | 4             |
| 4746         | 1155              | 12             | 4             |
| 3343         | 1132              | 12             | 4             |
| 7725         | 4362              | 12             | 4             |
| 14170        | 4506              | 12             | 4             |
| 11197        | 3843              | 12             | 4             |
| 9445         | 3974              | 12             | 4             |
| 18149        | 3678              | 12             | 4             |

| NUCLEUS AREA | FUORESCENT SIGNAL | PASSAGE NUMBER | EXPERIMENT ID |
|--------------|-------------------|----------------|---------------|
| 10031        | 4854              | 12             | 4             |
| 7568         | 1886              | 12             | 4             |
| 23088        | 6133              | 12             | 4             |
| 11986        | 2807              | 12             | 4             |
| 10144        | 6217              | 12             | 4             |
| 11824        | 4049              | 12             | 4             |
| 12510        | 3883              | 12             | 4             |
| 10663        | 5556              | 12             | 4             |
| 5953         | 1057              | 12             | 4             |
| 5220         | 976               | 12             | 4             |
| 8465         | 2600              | 12             | 4             |
| 12172        | 2413              | 12             | 4             |
| 7780         | 2847              | 12             | 4             |
| 8419         | 3321              | 12             | 4             |
| 6451         | 2025              | 12             | 4             |
| 8536         | 1295              | 12             | 4             |
| 5296         | 1509              | 12             | 4             |
| 11334        | 5977              | 12             | 4             |
| 9520         | 2794              | 12             | 4             |
| 11838        | 3410              | 12             | 4             |
| 12862        | 3340              | 12             | 4             |
| 4930         | 730               | 12             | 4             |
| 6089         | 885               | 12             | 4             |
| 4774         | 1908              | 12             | 4             |
| 7371         | 1852              | 12             | 4             |
| 6638         | 2026              | 12             | 4             |
| 7391         | 2462              | 12             | 4             |
| 4366         | 915               | 12             | 4             |
| 5183         | 1362              | 12             | 4             |
| 6741         | 907               | 12             | 4             |
| 4479         | 1061              | 12             | 4             |
| 8467         | 2085              | 12             | 4             |
| 7202         | 1116              | 12             | 4             |
| 8484         | 1855              | 12             | 4             |
| 4714         | 2109              | 12             | 4             |
| 5126         | 2103              | 12             | 4             |
| 8341         | 2292              | 12             | 4             |
| 7853         | 1987              | 12             | 4             |
| 6168         | 2276              | 12             | 4             |
| 7197         | 2643              | 12             | 4             |
| 6943         | 2141              | 12             | 4             |
| 5993         | 2287              | 12             | 4             |
| 9204         | 3030              | 12             | 4             |
| 6606         | 2020              | 12             | 4             |
| 6611         | 4187              | 12             | 4             |
| 4317         | 1508              | 12             | 4             |
| 5670         | 1560              | 12             | 4             |
| 13206        | 5064              | 12             | 4             |

| NUCLEUS AREA | FUORESCENT SIGNAL | PASSAGE NUMBER | EXPERIMENT ID |
|--------------|-------------------|----------------|---------------|
| 10919        | 2885              | 12             | 4             |
| 8145         | 3011              | 12             | 4             |
| 7800         | 2924              | 12             | 4             |
| 4140         | 1701              | 12             | 4             |
| 12832        | 6012              | 12             | 4             |
| 4920         | 2002              | 12             | 4             |
| 12590        | 6083              | 12             | 4             |
| 4864         | 3672              | 12             | 4             |
| 8446         | 6911              | 12             | 4             |
| 13365        | 5515              | 12             | 4             |
| 3689         | 1626              | 12             | 4             |
| 4525         | 1573              | 12             | 4             |
| 3415         | 636               | 12             | 4             |
| 6378         | 1599              | 12             | 4             |
| 14501        | 5090              | 12             | 4             |
| 12195        | 2944              | 12             | 4             |
| 13558        | 5885              | 12             | 4             |
| 12260        | 5926              | 12             | 4             |
| 4147         | 1659              | 12             | 4             |
| 11448        | 5584              | 12             | 4             |
| 5065         | 1646              | 12             | 4             |
| 12850        | 5112              | 12             | 4             |
| 5294         | 2124              | 12             | 4             |
| 5185         | 2368              | 12             | 4             |
| 5766         | 3032              | 12             | 4             |
| 8069         | 2593              | 12             | 4             |
| 3831         | 1834              | 12             | 4             |
| 8860         | 7631              | 12             | 4             |
| 10695        | 8972              | 12             | 4             |
| 6087         | 2301              | 12             | 4             |
| 5832         | 2238              | 12             | 4             |
| 2719         | 2703              | 12             | 4             |
| 8931         | 2274              | 12             | 4             |
| 6591         | 4475              | 12             | 4             |
| 6540         | 3724              | 12             | 4             |
| 9823         | 3407              | 12             | 4             |
| 16658        | 3958              | 12             | 4             |
| 7166         | 1936              | 12             | 4             |
| 3111         | 2703              | 12             | 4             |
| 10613        | 5143              | 12             | 4             |
| 2452         | 2334              | 12             | 4             |
| 7499         | 2364              | 12             | 4             |
| 4843         | 2138              | 12             | 4             |
| 3993         | 1610              | 12             | 4             |
| 10865        | 2634              | 12             | 4             |
| 13866        | 6527              | 12             | 4             |
| 5210         | 1292              | 12             | 4             |
| 11106        | 2748              | 12             | 4             |

| NUCLEUS AREA | FUORESCENT SIGNAL | PASSAGE NUMBER | EXPERIMENT ID |
|--------------|-------------------|----------------|---------------|
| 4811         | 1354              | 12             | 4             |
| 7996         | 6001              | 12             | 4             |
| 10953        | 2809              | 12             | 4             |
| 5913         | 2224              | 13             | 2             |
| 5743         | 1829              | 13             | 2             |
| 21616        | 14790             | 13             | 2             |
| 5252         | 1235              | 13             | 2             |
| 11428        | 2834              | 13             | 2             |
| 7905         | 2002              | 13             | 2             |
| 8038         | 2827              | 13             | 2             |
| 13460        | 3188              | 13             | 2             |
| 7132         | 2118              | 13             | 2             |
| 5121         | 1187              | 13             | 2             |
| 15214        | 6856              | 13             | 2             |
| 10414        | 2878              | 13             | 2             |
| 6982         | 1650              | 13             | 2             |
| 11152        | 5320              | 13             | 2             |
| 8876         | 1870              | 13             | 2             |
| 6338         | 1036              | 13             | 2             |
| 7621         | 3291              | 13             | 2             |
| 7018         | 1739              | 13             | 2             |
| 9453         | 4397              | 13             | 2             |
| 11590        | 4257              | 13             | 2             |
| 9645         | 5945              | 13             | 2             |
| 8473         | 4238              | 13             | 2             |
| 14826        | 13119             | 13             | 2             |
| 9919         | 4859              | 13             | 2             |
| 9394         | 7382              | 13             | 2             |
| 13025        | 10806             | 13             | 2             |
| 13542        | 11178             | 13             | 2             |
| 7315         | 4735              | 13             | 2             |
| 7039         | 4623              | 13             | 2             |
| 9321         | 6651              | 13             | 2             |
| 12494        | 4977              | 13             | 2             |
| 9467         | 5341              | 13             | 2             |
| 16179        | 9259              | 13             | 2             |
| 11792        | 7126              | 13             | 2             |
| 8960         | 6089              | 13             | 2             |
| 11985        | 5878              | 13             | 2             |
| 11227        | 5428              | 13             | 2             |
| 10192        | 5427              | 13             | 2             |
| 6374         | 2859              | 13             | 2             |
| 10982        | 4097              | 13             | 2             |
| 8693         | 5323              | 13             | 2             |
| 10241        | 4054              | 13             | 2             |
| 10951        | 5681              | 13             | 2             |
| 8305         | 4974              | 13             | 2             |
| 15421        | 8071              | 13             | 2             |

| NUCLEUS AREA | FUORESCENT SIGNAL | PASSAGE NUMBER | EXPERIMENT ID |
|--------------|-------------------|----------------|---------------|
| 9074         | 2323              | 11             | 4             |
| 2409         | 366               | 11             | 4             |
| 2984         | 1033              | 11             | 4             |
| 1997         | 646               | 11             | 4             |
| 2164         | 484               | 11             | 4             |
| 2143         | 506               | 11             | 4             |
| 9042         | 1568              | 11             | 4             |
| 2724         | 768               | 11             | 4             |
| 2108         | 438               | 11             | 4             |
| 11632        | 2862              | 11             | 4             |
| 10330        | 1789              | 11             | 4             |
| 12674        | 2251              | 11             | 4             |
| 9596         | 2593              | 11             | 4             |
| 5006         | 644               | 11             | 4             |
| 10102        | 1668              | 11             | 4             |
| 12899        | 2279              | 11             | 4             |
| 12614        | 2459              | 11             | 4             |
| 7057         | 1057              | 11             | 4             |
| 23242        | 5653              | 11             | 4             |
| 5427         | 2283              | 11             | 4             |
| 4419         | 838               | 11             | 4             |
| 3903         | 643               | 11             | 4             |
| 8471         | 1582              | 11             | 4             |
| 20145        | 6363              | 11             | 4             |
| 7846         | 1106              | 11             | 4             |
| 15622        | 3162              | 11             | 4             |
| 19280        | 4056              | 11             | 4             |
| 28878        | 5722              | 11             | 4             |
| 31981        | 13712             | 11             | 4             |
| 8374         | 1507              | 11             | 4             |
| 29148        | 6322              | 11             | 4             |
| 7012         | 1985              | 11             | 4             |
| 28009        | 4943              | 11             | 4             |
| 6046         | 2003              | 11             | 4             |
| 14752        | 2604              | 11             | 4             |
| 10191        | 1592              | 11             | 4             |
| 45606        | 13448             | 11             | 4             |
| 9203         | 1747              | 11             | 4             |
| 12354        | 2120              | 11             | 4             |
| 11995        | 2538              | 11             | 4             |
| 41137        | 11747             | 11             | 4             |
| 6618         | 1009              | 11             | 4             |
| 6904         | 1693              | 11             | 4             |
| 29452        | 3503              | 11             | 4             |
| 8933         | 1585              | 11             | 4             |
| 4244         | 1323              | 11             | 4             |
| 10437        | 1580              | 11             | 4             |
| 19441        | 4754              | 11             | 4             |



| NUCLEUS AREA | FUORESCENT SIGNAL | PASSAGE NUMBER | EXPERIMENT ID |
|--------------|-------------------|----------------|---------------|
| 13235        | 1718              | 11             | 4             |
| 7606         | 1459              | 11             | 4             |
| 19100        | 5514              | 11             | 4             |
| 31201        | 8033              | 11             | 4             |
| 22832        | 11430             | 11             | 4             |
| 24897        | 4758              | 11             | 4             |
| 9031         | 2489              | 11             | 4             |
| 15691        | 3874              | 11             | 4             |
| 8985         | 1751              | 11             | 4             |
| 22527        | 7729              | 11             | 4             |
| 13389        | 3581              | 11             | 4             |
| 14600        | 1484              | 11             | 4             |
| 3834         | 566               | 11             | 4             |
| 11621        | 1597              | 11             | 4             |
| 9990         | 2524              | 11             | 4             |
| 7472         | 1262              | 11             | 4             |
| 26564        | 4534              | 11             | 4             |
| 25386        | 9033              | 11             | 4             |
| 21825        | 6494              | 11             | 4             |
| 29754        | 17920             | 11             | 4             |
| 28297        | 7747              | 11             | 4             |
| 7183         | 997               | 11             | 4             |
| 14167        | 3219              | 11             | 4             |
| 17276        | 6156              | 11             | 4             |
| 11181        | 2808              | 11             | 4             |
| 32757        | 7765              | 11             | 4             |
| 10897        | 2357              | 11             | 4             |
| 13569        | 3249              | 11             | 4             |
| 9086         | 1023              | 11             | 4             |
| 12934        | 2757              | 11             | 4             |
| 19109        | 7282              | 11             | 4             |
| 17261        | 4781              | 11             | 4             |
| 18417        | 5127              | 11             | 4             |
| 25904        | 4814              | 11             | 4             |
| 25679        | 7969              | 11             | 4             |
| 8251         | 1235              | 11             | 4             |
| 35875        | 12068             | 11             | 4             |
| 13493        | 2245              | 11             | 4             |
| 11601        | 1999              | 11             | 4             |
| 21922        | 7074              | 11             | 4             |
| 14030        | 3978              | 11             | 4             |
| 11251        | 2295              | 11             | 4             |
| 15109        | 2461              | 11             | 4             |
| 12175        | 5108              | 11             | 4             |
| 14364        | 5009              | 11             | 4             |
| 12646        | 3323              | 11             | 4             |
| 12393        | 3590              | 11             | 4             |
| 10249        | 1743              | 11             | 4             |

| NUCLEUS AREA | FUORESCENT SIGNAL | PASSAGE NUMBER | EXPERIMENT ID |
|--------------|-------------------|----------------|---------------|
| 24000        | 5375              | 11             | 4             |
| 22628        | 7022              | 11             | 4             |
| 9708         | 1971              | 11             | 4             |
| 10394        | 3246              | 11             | 4             |
| 8946         | 1561              | 11             | 4             |
| 18279        | 8039              | 11             | 4             |
| 5354         | 1484              | 10             | 4             |
| 6812         | 2817              | 10             | 4             |
| 5450         | 2020              | 10             | 4             |
| 6922         | 2993              | 10             | 4             |
| 5697         | 1387              | 10             | 4             |
| 5392         | 2886              | 10             | 4             |
| 11332        | 3337              | 10             | 4             |
| 3649         | 994               | 10             | 4             |
| 4079         | 1051              | 10             | 4             |
| 5550         | 1249              | 10             | 4             |
| 5530         | 1583              | 10             | 4             |
| 9323         | 3339              | 10             | 4             |
| 4938         | 1219              | 10             | 4             |
| 7172         | 1335              | 10             | 4             |
| 4738         | 1175              | 10             | 4             |
| 4617         | 1221              | 10             | 4             |
| 6528         | 1543              | 10             | 4             |
| 4696         | 1097              | 10             | 4             |
| 2412         | 392               | 10             | 4             |
| 9755         | 1555              | 10             | 4             |
| 2931         | 395               | 10             | 4             |
| 9361         | 1627              | 10             | 4             |
| 9741         | 2715              | 10             | 4             |
| 8861         | 1708              | 10             | 4             |
| 7943         | 1366              | 10             | 4             |
| 5485         | 1251              | 10             | 4             |
| 5045         | 1012              | 10             | 4             |
| 6137         | 1409              | 10             | 4             |
| 8005         | 1776              | 10             | 4             |
| 10950        | 2717              | 10             | 4             |
| 5962         | 1047              | 10             | 4             |
| 3610         | 807               | 10             | 4             |
| 6796         | 1225              | 10             | 4             |
| 2029         | 307               | 10             | 4             |
| 7857         | 1283              | 10             | 4             |
| 6186         | 935               | 10             | 4             |
| 5171         | 1089              | 10             | 4             |
| 4569         | 820               | 10             | 4             |
| 10652        | 1953              | 10             | 4             |
| 4141         | 596               | 10             | 4             |
| 9840         | 1917              | 10             | 4             |
| 10213        | 3257              | 10             | 4             |

| NUCLEUS AREA | FUORESCENT SIGNAL | PASSAGE NUMBER | EXPERIMENT ID |
|--------------|-------------------|----------------|---------------|
| 9089         | 1626              | 10             | 4             |
| 7937         | 1186              | 10             | 4             |
| 5493         | 1012              | 10             | 4             |
| 5413         | 1075              | 10             | 4             |
| 4597         | 1993              | 10             | 4             |
| 5638         | 2829              | 10             | 4             |
| 4154         | 558               | 10             | 4             |
| 4247         | 3217              | 10             | 4             |
| 6739         | 1299              | 10             | 4             |
| 3935         | 2835              | 10             | 4             |
| 5465         | 1448              | 10             | 4             |
| 6835         | 2550              | 10             | 4             |
| 8343         | 1404              | 10             | 4             |
| 6346         | 1582              | 10             | 4             |
| 6980         | 1332              | 10             | 4             |
| 3741         | 566               | 10             | 4             |
| 7945         | 1292              | 10             | 4             |
| 6630         | 963               | 10             | 4             |
| 5127         | 1043              | 10             | 4             |
| 4156         | 585               | 10             | 4             |
| 10148        | 1403              | 10             | 4             |
| 4577         | 996               | 10             | 4             |
| 13629        | 4010              | 10             | 4             |
| 4490         | 1038              | 10             | 4             |
| 5563         | 1052              | 10             | 4             |
| 5512         | 1378              | 10             | 4             |
| 5523         | 1470              | 10             | 4             |
| 5324         | 2736              | 10             | 4             |
| 6217         | 3326              | 10             | 4             |
| 4391         | 754               | 10             | 4             |
| 4418         | 3445              | 10             | 4             |
| 6861         | 1463              | 10             | 4             |
| 4022         | 2914              | 10             | 4             |
| 5495         | 1576              | 10             | 4             |
| 6887         | 2684              | 10             | 4             |
| 8167         | 1362              | 10             | 4             |
| 6293         | 1441              | 10             | 4             |
| 2086         | 288               | 10             | 4             |
| 6889         | 1214              | 10             | 4             |
| 4489         | 1037              | 10             | 4             |
| 7578         | 1357              | 10             | 4             |
| 5650         | 1516              | 10             | 4             |
| 2178         | 611               | 10             | 4             |
| 7153         | 1740              | 10             | 4             |
| 5516         | 1477              | 10             | 4             |
| 4384         | 733               | 10             | 4             |
| 4003         | 2896              | 10             | 4             |
| 4946         | 1342              | 10             | 4             |

| NUCLEUS AREA | FUORESCENT SIGNAL | PASSAGE NUMBER | EXPERIMENT ID |
|--------------|-------------------|----------------|---------------|
| 8204         | 1387              | 10             | 4             |
| 7489         | 1285              | 10             | 4             |
| 4227         | 519               | 10             | 4             |
| 6908         | 1213              | 10             | 4             |
| 3202         | 880               | 10             | 4             |
| 5221         | 727               | 10             | 4             |
| 4407         | 548               | 10             | 4             |
| 4108         | 594               | 10             | 4             |
| 8686         | 1367              | 10             | 4             |
| 6452         | 1606              | 10             | 4             |
| 6495         | 1714              | 10             | 4             |
| 6957         | 1761              | 10             | 4             |
| 6584         | 2077              | 10             | 4             |
| 7075         | 2233              | 10             | 4             |
| 4563         | 713               | 10             | 4             |
| 7377         | 1641              | 10             | 4             |
| 5102         | 825               | 10             | 4             |
| 7517         | 2363              | 10             | 4             |
| 4988         | 814               | 10             | 4             |
| 4982         | 1001              | 10             | 4             |
| 4679         | 1045              | 10             | 4             |
| 8021         | 2223              | 10             | 4             |
| 6661         | 1328              | 10             | 4             |
| 7280         | 1710              | 10             | 4             |
| 2921         | 753               | 10             | 4             |
| 5735         | 1221              | 10             | 4             |
| 6213         | 1267              | 10             | 4             |
| 5684         | 919               | 10             | 4             |
| 5378         | 856               | 10             | 4             |
| 6950         | 1348              | 10             | 4             |
| 4178         | 748               | 10             | 4             |
| 4354         | 782               | 10             | 4             |
| 4638         | 993               | 10             | 4             |
| 6935         | 1318              | 10             | 4             |
| 7854         | 2223              | 10             | 4             |
| 9038         | 2333              | 10             | 4             |
| 5711         | 1164              | 10             | 4             |
| 7869         | 1926              | 10             | 4             |
| 3948         | 511               | 10             | 4             |
| 7182         | 1413              | 10             | 4             |
| 9714         | 3168              | 10             | 4             |
| 7384         | 2259              | 10             | 4             |
| 5877         | 954               | 10             | 4             |
| 7639         | 2400              | 10             | 4             |
| 3209         | 739               | 10             | 4             |
| 3398         | 886               | 10             | 4             |
| 9506         | 2241              | 10             | 4             |
| 2733         | 343               | 10             | 4             |

| NUCLEUS AREA | FUORESCENT SIGNAL | PASSAGE NUMBER | EXPERIMENT ID |
|--------------|-------------------|----------------|---------------|
| 8980         | 2385              | 10             | 4             |
| 8777         | 1823              | 10             | 4             |
| 4554         | 947               | 10             | 4             |
| 4804         | 1052              | 10             | 4             |
| 8136         | 3028              | 10             | 4             |
| 11126        | 2662              | 10             | 4             |
| 11158        | 3261              | 10             | 4             |
| 11088        | 1846              | 10             | 4             |
| 3507         | 355               | 10             | 4             |
| 6515         | 945               | 10             | 4             |
| 5504         | 896               | 10             | 4             |
| 7554         | 774               | 10             | 4             |
| 5722         | 894               | 10             | 4             |
| 7726         | 1816              | 10             | 4             |
| 4671         | 673               | 10             | 4             |
| 5236         | 585               | 10             | 4             |
| 8846         | 2950              | 10             | 4             |
| 8374         | 2080              | 10             | 4             |
| 8848         | 3296              | 10             | 4             |
| 6799         | 1049              | 10             | 4             |
| 6606         | 1108              | 10             | 4             |
| 3273         | 486               | 10             | 4             |
| 3617         | 573               | 10             | 4             |
| 3448         | 821               | 10             | 4             |
| 3456         | 779               | 10             | 4             |
| 2976         | 484               | 10             | 4             |
| 4471         | 799               | 10             | 4             |
| 10195        | 3324              | 10             | 4             |
| 8307         | 1613              | 10             | 4             |
| 6873         | 2675              | 10             | 4             |
| 5387         | 774               | 10             | 4             |
| 5888         | 915               | 10             | 4             |
| 9687         | 2361              | 10             | 4             |
| 2362         | 302               | 10             | 4             |
| 5129         | 906               | 10             | 4             |
| 4127         | 622               | 10             | 4             |
| 4735         | 846               | 10             | 4             |
| 3931         | 747               | 10             | 4             |
| 10776        | 2829              | 10             | 4             |
| 4695         | 702               | 10             | 4             |
| 5124         | 605               | 10             | 4             |
| 4551         | 554               | 10             | 4             |
| 4487         | 490               | 10             | 4             |
| 5440         | 822               | 10             | 4             |
| 6103         | 1251              | 10             | 4             |
| 4621         | 661               | 10             | 4             |
| 5039         | 642               | 10             | 4             |
| 4959         | 893               | 10             | 4             |

| NUCLEUS AREA | FUORESCENT SIGNAL | PASSAGE NUMBER | EXPERIMENT ID |
|--------------|-------------------|----------------|---------------|
| 8061         | 1238              | 10             | 4             |
| 3570         | 504               | 10             | 4             |
| 8401         | 1524              | 10             | 4             |
| 5351         | 891               | 10             | 4             |
| 4105         | 808               | 10             | 4             |
| 4233         | 786               | 10             | 4             |
| 7344         | 1099              | 10             | 4             |
| 5711         | 1337              | 10             | 4             |

**Table 1.** This table contains the data used in this work. Each row represents the data from a single cell in each one of the performed experiments. The first column contains the size of the cellular nucleus, estimated with fluorescent probing. The second column contains the raw value of the fluorescence signal returned by the microscope. The third column represent the replicative passage of the observation. The fourth column represent which replication of the experiment was used for the observation.
